# Supplementary material for: Ring-opening (co)polymerization of chiral seven-membered lactones mediated by achiral yttrium catalysts: insights into the catalyst stereocontrol by mass spectrometry
Source: Royal Society of Chemistry journal article supplement (doi:10.1039/d4py00330f), 2024-01-01
Supplement: d4py00330f1.pdf [file d4py00330f1.pdf]

## Supporting Information

for

### **Ring-opening homo- and co-polymerization of chiral seven-membered lactones mediated by achiral yttrium catalysts: Insights into the catalyst stereocontrol by mass spectrometry**

Ali Dhaini,<sup>a</sup> Jérôme Ollivier,<sup>a</sup> Nicolas Le Yondre,<sup>b</sup> Ali Alaaeddine,<sup>c</sup> Sophie M. Guillaume (ORCID: 0000-0003-2917-8657),<sup>a,\*</sup> and Jean-François Carpentier (ORCID: 0000-0002-9160-7662)<sup>a,\*</sup>

<sup>a</sup> Univ. Rennes, CNRS, Institut des Sciences Chimiques de Rennes, UMR 6226, F-35042 Rennes, France.

<sup>b</sup> Univ. Rennes, Centre Régional de Mesures Physiques de l'Ouest, UAR 2025 ScanMAT, F-35042 Rennes, France.

<sup>c</sup> Univ. Libanaise, Campus Universitaire Rafic Hariri Hadath, Faculté des Sciences, Laboratoire de Chimie Médicinale et des Produits Naturels, Beirut, Lebanon.

\* Corresponding authors: E-mail: [sophie.guillaume@univ-rennes.fr](mailto:sophie.guillaume@univ-rennes.fr), [jean-francois.carpentier@univ-rennes.fr](mailto:jean-francois.carpentier@univ-rennes.fr)

## Table of contents:

|                                                                                                                                                                                                                                                                                                                                                                                                                                                                                                                                                                                                                                                                                                                                                                                                                                                                                                                                                                                               |    |
|-----------------------------------------------------------------------------------------------------------------------------------------------------------------------------------------------------------------------------------------------------------------------------------------------------------------------------------------------------------------------------------------------------------------------------------------------------------------------------------------------------------------------------------------------------------------------------------------------------------------------------------------------------------------------------------------------------------------------------------------------------------------------------------------------------------------------------------------------------------------------------------------------------------------------------------------------------------------------------------------------|----|
| <b>Figure S1.</b> $^1\text{H}$ NMR spectrum (400 MHz, $\text{CDCl}_3$ , 25 °C) of <i>rac</i> - $\text{CL}^{\text{Me}}$ . .....                                                                                                                                                                                                                                                                                                                                                                                                                                                                                                                                                                                                                                                                                                                                                                                                                                                                | 6  |
| <b>Figure S2.</b> JMOD $^{13}\text{C}\{^1\text{H}\}$ NMR spectrum (125 MHz, $\text{CDCl}_3$ , 25 °C) of <i>rac</i> - $\text{CL}^{\text{Me}}$ . .....                                                                                                                                                                                                                                                                                                                                                                                                                                                                                                                                                                                                                                                                                                                                                                                                                                          | 6  |
| <b>Figure S3.</b> Chiral HPLC traces for <i>racemic</i> - $\text{CL}^{\text{Me}}$ , ( <i>S</i> )- $\text{CL}^{\text{Me}}$ and ( <i>R</i> )- $\text{CL}^{\text{Me}}$ (see the Experimental section for details) .....                                                                                                                                                                                                                                                                                                                                                                                                                                                                                                                                                                                                                                                                                                                                                                          | 8  |
| <b>Figure S4.</b> Chiral HPLC traces for <i>racemic</i> - $\text{CL}^{\text{nBu}}$ , ( <i>R</i> )- $\text{CL}^{\text{nBu}}$ and ( <i>S</i> )- $\text{CL}^{\text{nBu}}$ (see the Experimental section for details) .....                                                                                                                                                                                                                                                                                                                                                                                                                                                                                                                                                                                                                                                                                                                                                                       | 10 |
| <b>Figure S5.</b> $^1\text{H}$ NMR spectrum (500 MHz, $\text{CDCl}_3$ , 25 °C) of a $\text{PCL}^{\text{Me}}$ homopolymer prepared from the ROP of <i>rac</i> - $\text{CL}^{\text{Me}}$ (30 equiv) mediated by the <b>1a</b> /BnOH (1:1) catalyst system (Table S1, entry 1-105). * stands for resonances of residual solvent and/or catalyst. ....                                                                                                                                                                                                                                                                                                                                                                                                                                                                                                                                                                                                                                            | 11 |
| <b>Figure S6.</b> JMOD $^{13}\text{C}\{^1\text{H}\}$ NMR spectrum (125 MHz, $\text{CDCl}_3$ , 25 °C) of a $\text{PCL}^{\text{Me}}$ homopolymer prepared from the ROP of <i>rac</i> - $\text{CL}^{\text{Me}}$ (30 equiv) by the <b>1a</b> /BnOH (1:1) catalyst system (Table S1, entry 1-105). * stands for resonances of residual solvent and/or catalyst...11                                                                                                                                                                                                                                                                                                                                                                                                                                                                                                                                                                                                                                | 11 |
| <b>Figure S7.</b> $^1\text{H}$ NMR spectrum (500 MHz, $\text{CDCl}_3$ , 25 °C) of a $\text{PCL}^{\text{nBu}}$ homopolymer prepared from the ROP of <i>rac</i> - $\text{CL}^{\text{nBu}}$ (30 equiv) mediated by the <b>1a</b> /BnOH (1:1) catalyst system (Table S1, entry 1-107). * stands for resonances of residual solvent and/or catalyst. ....                                                                                                                                                                                                                                                                                                                                                                                                                                                                                                                                                                                                                                          | 12 |
| <b>Figure S8.</b> JMOD $^{13}\text{C}\{^1\text{H}\}$ spectrum (500 MHz, $\text{CDCl}_3$ , 25 °C) of a $\text{PCL}^{\text{nBu}}$ homopolymer prepared from the ROP of <i>rac</i> - $\text{CL}^{\text{nBu}}$ (30 equiv) mediated by the <b>1a</b> /BnOH (1:1) catalyst system (Table S1, entry 1-107). * stands for resonances of residual solvent and/or catalyst. ....                                                                                                                                                                                                                                                                                                                                                                                                                                                                                                                                                                                                                        | 12 |
| <b>Table S1.</b> ROP of <i>rac</i> - $\text{CL}^{\text{Me}}$ and <i>rac</i> - $\text{CL}^{\text{nBu}}$ mediated by the <b>1a</b> /BnOH, $\{\text{BDI}^{\text{DIPP}}\}\text{Zn}(\text{NTMS}_2)/\text{BnOH}$ and $\text{KO}t\text{Bu}$ catalyst systems. <sup>a</sup> .....                                                                                                                                                                                                                                                                                                                                                                                                                                                                                                                                                                                                                                                                                                                     | 13 |
| <b>Figure S9.</b> $^1\text{H}$ NMR spectrum (400 MHz, $\text{CDCl}_3$ , 25 °C) of a $\text{P}(\text{CL}^{\text{Me}}\text{-co-CL}^{\text{nBu}})$ copolymer prepared from the ROCOP of a 1:1 mixture of ( <i>S</i> )- $\text{CL}^{\text{Me}}$ and ( <i>R</i> )- $\text{CL}^{\text{nBu}}$ mediated by the <b>1b</b> /BnOH (1:1) catalyst system (Table 1, entry 6). * stands for resonances of residual solvent and/or catalyst. ....                                                                                                                                                                                                                                                                                                                                                                                                                                                                                                                                                            | 14 |
| <b>Figure S10.</b> $^{13}\text{C}\{^1\text{H}\}$ NMR spectrum (125 MHz, $\text{CDCl}_3$ , 25 °C) of a $\text{P}(\text{CL}^{\text{Me}}\text{-co-CL}^{\text{nBu}})$ copolymer prepared from the ROCOP of a 1:1 mixture of ( <i>S</i> )- $\text{CL}^{\text{Me}}$ and ( <i>R</i> )- $\text{CL}^{\text{nBu}}$ (1:1) mediated by the <b>1b</b> /BnOH (1:1) catalyst system (Table 1, entry 6). * stands for resonances of residual solvent and/or catalyst. ....                                                                                                                                                                                                                                                                                                                                                                                                                                                                                                                                    | 14 |
| <b>Figure S11.</b> From bottom to top: $^1\text{H}$ NMR (400 MHz, $\text{CDCl}_3$ , 25 °C) spectra of the starting comonomers; $^1\text{H}$ NMR (400 MHz, $\text{CDCl}_3$ , 25 °C) spectra for the monitoring of the ROCOP of a 1:1 mixture of ( <i>R</i> )- $\text{CL}^{\text{nBu}}$ and ( <i>S</i> )- $\text{CL}^{\text{Me}}$ mediated by the <b>1b</b> /BnOH (1:1) catalyst system at 20 °C. Reaction time = 1 h: conv( $\text{CL}^{\text{nBu}}$ / $\text{CL}^{\text{Me}}$ ) = 58 and 62% respectively; ratio ( $\text{CL}^{\text{nBu}}$ / $\text{CL}^{\text{Me}}$ ) = 1.14. Reaction time = 2 h: conv( $\text{CL}^{\text{nBu}}$ / $\text{CL}^{\text{Me}}$ ) = 71 and 72%, respectively; ratio ( $\text{CL}^{\text{nBu}}$ / $\text{CL}^{\text{Me}}$ ) = 1.05. Reaction time = 4 h: conv( $\text{CL}^{\text{nBu}}$ / $\text{CL}^{\text{Me}}$ ) = 90 and 99%, respectively; ratio ( $\text{CL}^{\text{nBu}}$ / $\text{CL}^{\text{Me}}$ ) = 10. * stands for resonances of the copolymer..... | 15 |
| <b>Figure S12.</b> Fineman –Ross plot for the determination of monomer reactivity ratio of $\text{CL}^{\text{Me}}$ and $\text{CL}^{\text{nBu}}$ in the copolymerization by the <b>1a</b> /BnOH (1:1) system in toluene at 20 °C.....                                                                                                                                                                                                                                                                                                                                                                                                                                                                                                                                                                                                                                                                                                                                                          | 15 |

**Figure S13.** MALDI-ToF mass spectrum (DCTB matrix, ionized by Na<sup>+</sup>) of a P(CL<sup>Me</sup>-*co*-CL<sup>nBu</sup>) copolymer prepared by ROCOP of (*S*)-CL<sup>Me</sup> and (*R*)-CL<sup>nBu</sup> (1:1) with the **1b**/BnOH catalyst system (Table 1, entry 6). .....16

**Figure S14.** MALDI-ToF mass spectrum (DCTB matrix, ionized by Na<sup>+</sup>) of a P(CL<sup>Me</sup>-*co*-CL<sup>nBu</sup>) copolymer prepared by ROCOP of (*S*)-CL<sup>Me</sup> and (*R*)-CL<sup>nBu</sup> (1:1) with the **1a**/BnOH catalyst system (Table 1, entry 2). .....16

**Figure S15.** “Polymers” software for automatic generation of theoretical *m/z* peaks and assignment to experimental *m/z* mass peaks. ....17

**Figure S16.** ESI-mass spectrum (solvent CH<sub>2</sub>Cl<sub>2</sub>) of a P(CL<sup>Me</sup>-*co*-CL<sup>nBu</sup>) copolymer prepared by ROCOP of a 1:1 mixture of (*S*)-CL<sup>Me</sup> and (*R*)-CL<sup>nBu</sup> with the **1a**/BnOH catalyst system (Table 1, entry 3). .....17

**Figure S17.** Details of the high resolution ESI mass spectra of a P(CL<sup>nBu</sup>-*co*-CL<sup>Me</sup>) copolymer prepared by ROCOP of a 1:1 mixture of (*R*)-CL<sup>nBu</sup> and (*S*)-CL<sup>Me</sup> with the **1a**/BnOH catalyst system (Table 1, entry 3), from top to bottom: (a) experimental spectrum (solvent: CH<sub>2</sub>Cl<sub>2</sub>) for *m/z* = 1000–1100, (b) zoomed region for *m/z* = 998–1008, showing resolved peaks for cyclic P[(CL<sup>nBu</sup>)<sub>5</sub>-*co*-(CL<sup>Me</sup>)] (*m/z*<sub>exp</sub> (all <sup>12</sup>C) = 1001.7265) and cyclic P[(CL<sup>nBu</sup>)<sub>2</sub>-*co*-(CL<sup>Me</sup>)<sub>5</sub>] (*m/z*<sub>exp</sub> (all <sup>12</sup>C) = 1003.6694); (c) calculated spectrum (isotopic pattern) for cyclic P[(CL<sup>nBu</sup>)<sub>5</sub>-*co*-(CL<sup>Me</sup>)] (*m/z*<sub>calcd</sub> (all <sup>12</sup>C) = 1001.7263); (d) calculated spectrum (isotopic pattern) for cyclic P[(CL<sup>nBu</sup>)<sub>2</sub>-*co*-(CL<sup>Me</sup>)<sub>5</sub>] (*m/z*<sub>calcd</sub> (all <sup>12</sup>C) = 1003.6692). .....18

**Figure S18.** Details of the high resolution ESI mass spectra of a P(CL<sup>nBu</sup>-*co*-CL<sup>Me</sup>) copolymer prepared by ROCOP of a 1:1 mixture of (*R*)-CL<sup>nBu</sup> and (*S*)-CL<sup>Me</sup> with the **1a**/BnOH catalyst system (Table 1, entry 3), from top to bottom: (a) experimental spectrum (solvent: CH<sub>2</sub>Cl<sub>2</sub>) for *m/z* = 1000–1100, (b) zoomed region for *m/z* = 1021-1031, showing resolved peaks for linear P[(CL<sup>nBu</sup>)<sub>3</sub>-*co*-(CL<sup>Me</sup>)<sub>3</sub>]-C<sub>7</sub>H<sub>8</sub>O – 2H (*m/z*<sub>exp</sub> (all <sup>12</sup>C) = 1023.6748) and linear P[(CL<sup>nBu</sup>)<sub>3</sub>-*co*-(CL<sup>Me</sup>)<sub>3</sub>]-C<sub>7</sub>H<sub>8</sub>O (*m/z*<sub>exp</sub> (all <sup>12</sup>C) = 1025.6899); (c) calculated spectrum (isotopic pattern) for cyclic linear P[(CL<sup>nBu</sup>)<sub>3</sub>-*co*-(CL<sup>Me</sup>)<sub>3</sub>]-C<sub>7</sub>H<sub>8</sub>O – 2H (*m/z*<sub>calcd</sub> (all <sup>12</sup>C) = 1023.6743); (d) calculated spectrum (isotopic pattern) for linear P[(CL<sup>nBu</sup>)<sub>3</sub>-*co*-(CL<sup>Me</sup>)<sub>3</sub>]-C<sub>7</sub>H<sub>8</sub>O (*m/z*<sub>calcd</sub> (all <sup>12</sup>C) = 1025.6900). .....19

**Figure S19.** Details of the high resolution ESI mass spectra of a P(CL<sup>nBu</sup>-*co*-CL<sup>Me</sup>) copolymer prepared by ROCOP of a 1:1 mixture of (*R*)-CL<sup>nBu</sup> and (*S*)-CL<sup>Me</sup> with the **1a**/BnOH catalyst system (Table 1, entry 3), from top to bottom: (a) experimental spectrum (solvent: CH<sub>2</sub>Cl<sub>2</sub>) for *m/z* = 1000–1100, (b) zoomed region for *m/z* = 1041-1051, showing resolved peaks for cyclic P[(CL<sup>nBu</sup>)<sub>6</sub>-*co*-(CL<sup>Me</sup>)<sub>0</sub>] (*m/z*<sub>exp</sub> (all <sup>12</sup>C) = 1043.7739) and cyclic P[(CL<sup>nBu</sup>)<sub>3</sub>-*co*-(CL<sup>Me</sup>)<sub>4</sub>] (*m/z*<sub>exp</sub> (all <sup>12</sup>C) = 1045.7162); (c) calculated spectrum (isotopic pattern) for cyclic P[(CL<sup>nBu</sup>)<sub>6</sub>-*co*-(CL<sup>Me</sup>)<sub>0</sub>] (*m/z*<sub>calcd</sub> (all <sup>12</sup>C) = 1043.7733); (d) calculated spectrum (isotopic pattern) for cyclic P[(CL<sup>nBu</sup>)<sub>3</sub>-*co*-(CL<sup>Me</sup>)<sub>4</sub>] (*m/z*<sub>calcd</sub> (all <sup>12</sup>C) = 1045.7162). .....20

**Figure S20.** Details of the high resolution ESI mass spectra of a P(CL<sup>nBu</sup>-*co*-CL<sup>Me</sup>) copolymer prepared by ROCOP of a 1:1 mixture of (*R*)-CL<sup>nBu</sup> and (*S*)-CL<sup>Me</sup> with the **1a**/BnOH catalyst system (Table 1, entry 3), from top to bottom: (a) experimental spectrum (solvent: CH<sub>2</sub>Cl<sub>2</sub>) for *m/z* = 1000–1100, (b) zoomed region for *m/z* = 1063-1073, showing resolved peaks for linear P[(CL<sup>nBu</sup>)<sub>4</sub>-*co*-(CL<sup>Me</sup>)<sub>2</sub>]-C<sub>7</sub>H<sub>8</sub>O – 2H (*m/z*<sub>exp</sub> (all <sup>12</sup>C) = 1065.7215) and linear P[(CL<sup>nBu</sup>)<sub>4</sub>-*co*-(CL<sup>Me</sup>)<sub>2</sub>]-C<sub>7</sub>H<sub>8</sub>O (*m/z*<sub>exp</sub> (all <sup>12</sup>C) = 1067.7373); (c) calculated spectrum (isotopic pattern) for cyclic linear P[(CL<sup>nBu</sup>)<sub>4</sub>-*co*-(CL<sup>Me</sup>)<sub>2</sub>]-C<sub>7</sub>H<sub>8</sub>O – 2H (*m/z*<sub>calcd</sub> (all <sup>12</sup>C) = 1065.7213); (d) calculated

|                                                                                                                                                                                                                                                                                                                                                                                                                                                            |    |
|------------------------------------------------------------------------------------------------------------------------------------------------------------------------------------------------------------------------------------------------------------------------------------------------------------------------------------------------------------------------------------------------------------------------------------------------------------|----|
| spectrum (isotopic pattern) for linear P[(CL <sup>nBu</sup> ) <sub>4</sub> -co-(CL <sup>Me</sup> ) <sub>2</sub> ]-C <sub>7</sub> H <sub>8</sub> O ( $m/z_{\text{calcd}}$ (all <sup>12</sup> C) = 1067.7369).....                                                                                                                                                                                                                                           | 21 |
| <b>Figure S21.</b> MS/MS fragmentation ESI mass spectrum of the ion $m/z = 1622$ of a P(CL <sup>Me</sup> -co-CL <sup>nBu</sup> ) copolymer prepared by ROCOP of a 1:1 mixture of ( <i>S</i> )-CL <sup>Me</sup> and ( <i>R</i> )-CL <sup>nBu</sup> with the <b>1a</b> /BnOH catalyst system (Table 1, entry 3).....                                                                                                                                         | 22 |
| <b>Table S2.</b> Comparison of theoretical vs. experimental ESI-MS peaks for a P(CL <sup>nBu</sup> -co-CL <sup>Me</sup> ) copolymer (Table 1, entry 3) for $m/z$ values in the range 200–1800. A: stands for CL <sup>nBu</sup> and $x$ for the number of A units in the polymer chain, B: stands for CL <sup>Me</sup> and $y$ for the number of B units in the polymer chain. All non-assigned peaks or beyond the range are excluded from that table..... | 23 |
| <b>Figure S22.</b> Contour-plots generated by the COCONUT software from MALDI-ToF MS data of a P(CL <sup>nBu</sup> ) <sub><math>x</math></sub> -co-(CL <sup>Me</sup> ) <sub><math>y</math></sub> copolymer (Left: linear population; Right: cyclic population) (Table 1, entry 3).....                                                                                                                                                                     | 24 |
| <b>Figure S24.</b> Contour-plots generated by the COCONUT software <sup>i</sup> from MALDI-ToF MS data of a P(CL <sup>nBu</sup> ) <sub><math>x</math></sub> -co-(CL <sup>Me</sup> ) <sub><math>y</math></sub> copolymer (Left: linear population; Right: cyclic population) (Table 1, entry 6).....                                                                                                                                                        | 25 |
| <b>Figure S25.</b> Contour-plots generated by the COCONUT software <sup>i</sup> from MALDI-ToF MS data of a P(CL <sup>nBu</sup> ) <sub><math>x</math></sub> -co-(CL <sup>Me</sup> ) <sub><math>y</math></sub> copolymer (Left: linear population; Right: cyclic population) (Table 1, entry 2).....                                                                                                                                                        | 25 |
| <b>Figure S26.</b> Representative SEC traces of homopolymers prepared from the ROP of <i>rac</i> -CL <sup>Me</sup> and <i>rac</i> -CL <sup>nBu</sup> with yttrium catalyst systems <b>1a-b</b> /BnOH (see Table S1, entries 1/(1-015); 2/(1-117); 5/(1-107); 6/(1-114)). * stands for signal from residual ligand catalyst.....                                                                                                                            | 26 |
| <b>Figure S27.</b> Representative SEC traces of copolymers prepared from the ROP of equimolar mixtures of ( <i>S</i> )-CL <sup>Me</sup> and ( <i>R</i> )-CL <sup>nBu</sup> with yttrium catalyst systems <b>1a-b</b> /BnOH (see Table 1, entries 1-7). * stands for signal from residual ligand catalyst .....                                                                                                                                             | 27 |
| <b>Figure S28.</b> DSC thermogram (heating rate of 10 °C min <sup>-1</sup> , second heating cycle, from –80 to 200 °C) of a PCL <sup>Me</sup> homopolymer prepared from the ROP of <i>rac</i> -CL <sup>Me</sup> with the <b>1a</b> /BnOH catalyst system (Table S1, entry 1 /1-105).....                                                                                                                                                                   | 27 |
| <b>Figure S29.</b> DSC thermogram (heating rate of 10 °C min <sup>-1</sup> , second heating cycle, from –80 to 200 °C) of a PCL <sup>Me</sup> homopolymer prepared from the ROP of <i>rac</i> -CL <sup>Me</sup> with the Zn(BDI)/BnOH catalyst system (Table S1, entry 2 / 1-117).....                                                                                                                                                                     | 27 |
| <b>Figure S30.</b> DSC thermogram (heating rate of 10 °C min <sup>-1</sup> , second heating cycle, from –80 to 200 °C) of a PCL <sup>Me</sup> homopolymer prepared from the ROP of ( <i>S</i> )-CL <sup>Me</sup> with the Zn(BDI)/BnOH catalyst system (Table S1, entry 4 / 1-193).....                                                                                                                                                                    | 28 |
| <b>Figure S31.</b> DSC thermogram (heating rate of 10 °C min <sup>-1</sup> , second heating cycle, from –80 to 200 °C) of a PCL <sup>nBu</sup> homopolymer prepared from the ROP of <i>rac</i> -CL <sup>nBu</sup> with the <b>1a</b> /BnOH catalyst system (Table S1, entry 5 / 1-107).....                                                                                                                                                                | 28 |
| <b>Figure S32.</b> DSC thermogram (heating rate of 10 °C min <sup>-1</sup> , second heating cycle, from –80 to 200 °C) of a PCL <sup>nBu</sup> homopolymer prepared from the ROP of <i>rac</i> -CL <sup>nBu</sup> with the Zn(BDI)/BnOH catalyst system (Table S1, entry 6 / 1-114).....                                                                                                                                                                   | 29 |

**Figure S33.** DSC thermogram (heating rate of 10 °C min<sup>-1</sup>, second heating cycle, from -80 to 200 °C) of a PCL<sup>nBu</sup> homopolymer prepared from the ROP of (*R*)-CL<sup>nBu</sup> with the Zn(BDI)/BnOH catalyst system (Table S1, entry 8 / 1-164). .....29

**Figure S34.** DSC thermogram (heating rate of 10 °C min<sup>-1</sup>, second heating cycle, from -80 to 200 °C) of a P(CL<sup>Me</sup>-*co*-CL<sup>nBu</sup>) copolymer prepared from the ROCOP of a 1:1 mixture of (*S*)-CL<sup>Me</sup> and (*R*)-CL<sup>nBu</sup> mediated by the **1a**/BnOH (1:1) catalyst system (Table 1, entry 1). .....30

**Figure S35.** DSC thermogram (heating rate of 10 °C min<sup>-1</sup>, second heating cycle, from -80 to 200 °C) of a P(CL<sup>Me</sup>-*co*-CL<sup>nBu</sup>) copolymer prepared from the ROCOP of a 1:1 mixture of (*S*)-CL<sup>Me</sup> and (*R*)-CL<sup>nBu</sup> mediated by the **1b**/BnOH (1:1) catalyst system (Table 1, entry 6). .....30

**Figure S36.** DSC thermogram (heating rate of 10 °C min<sup>-1</sup>, second heating cycle, from -80 to 200 °C) of a P(CL<sup>Me</sup>-*co*-CL<sup>nBu</sup>) copolymer prepared from the ROCOP of a 1:1 mixture of (*S*)-CL<sup>Me</sup> and (*R*)-CL<sup>nBu</sup> mediated by the **1b**/BnOH (1:1) catalyst system (Table 1, entry 7). .....31

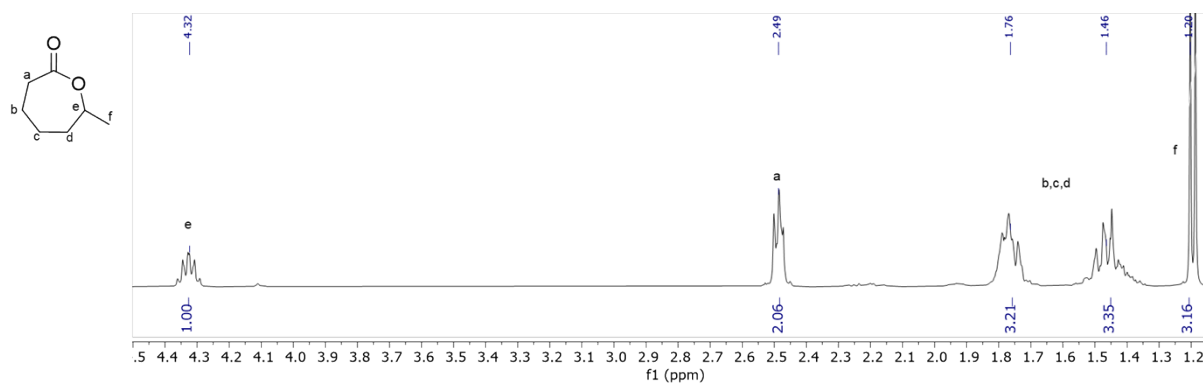

**Figure S1.**  $^1\text{H}$  NMR spectrum (400 MHz,  $\text{CDCl}_3$ , 25 °C) of *rac*-CL<sup>Me</sup>.

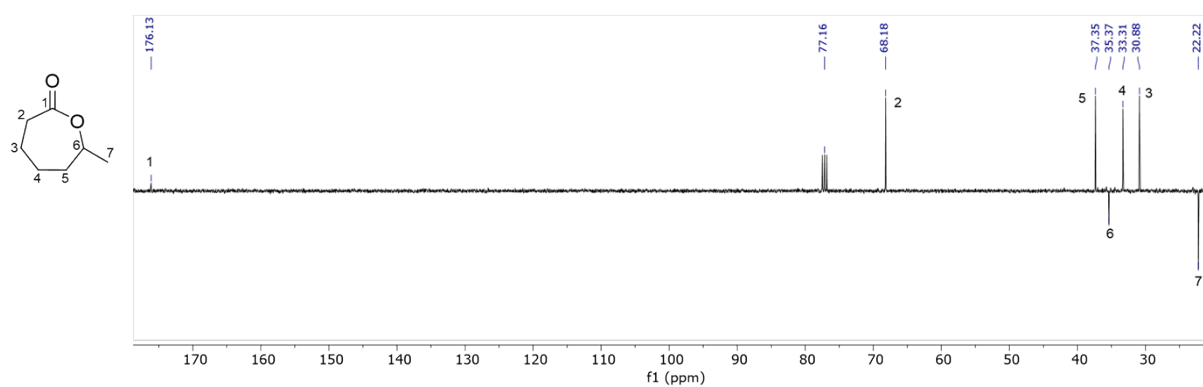

**Figure S2.** JMOD  $^{13}\text{C}\{^1\text{H}\}$  NMR spectrum (125 MHz,  $\text{CDCl}_3$ , 25 °C) of *rac*-CL<sup>Me</sup>.

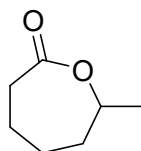

*rac*-CL<sup>Me</sup>

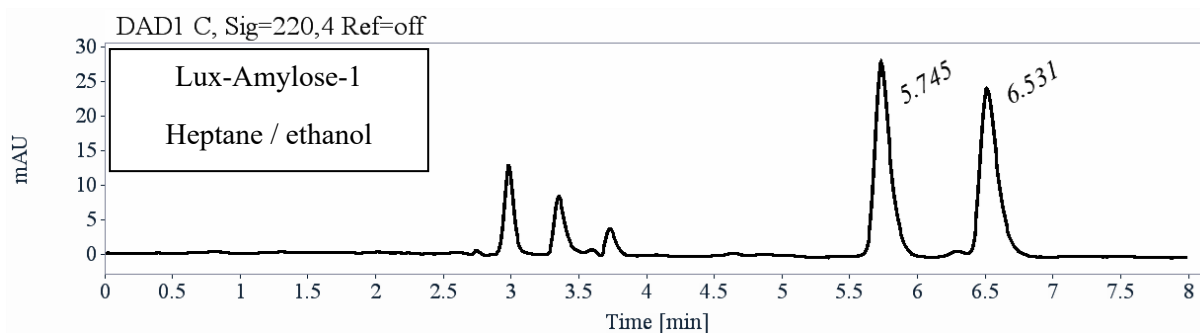

| RT [min] | Area | Area%  |
|----------|------|--------|
| 5.75     | 232  | 49.97  |
| 6.53     | 232  | 50.03  |
| Sum      | 464  | 100.00 |

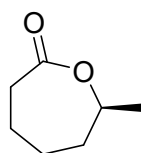

(*S*)-CL<sup>Me</sup>

- First fraction: the first eluted enantiomer with ee > 99 %

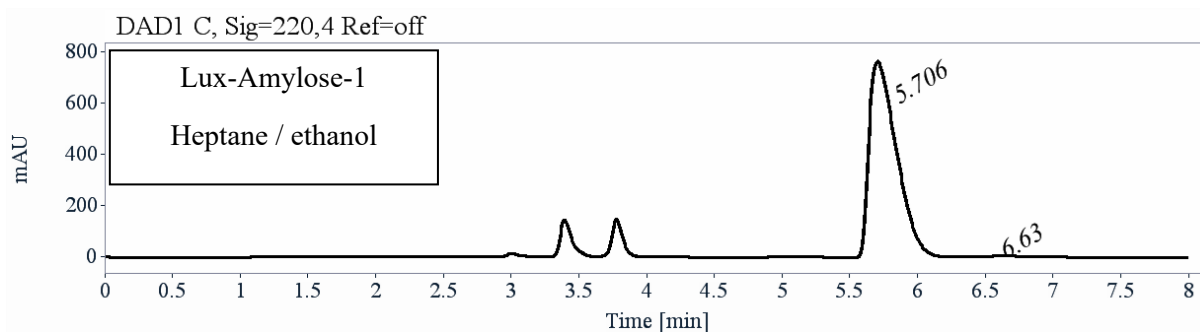

| RT [min] | Area  | Area%  |
|----------|-------|--------|
| 5.71     | 10723 | 99.65  |
| 6.63     | 38    | 0.35   |
| Sum      | 10761 | 100.00 |

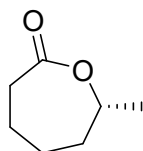

(*R*)-CL<sup>Me</sup>

- Second fraction: The second eluted enantiomer with ee > 99 %

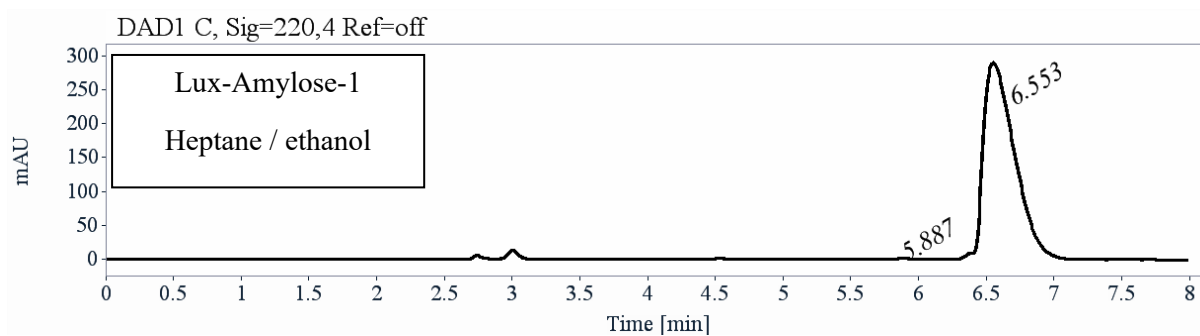

| RT [min] | Area | Area%  |
|----------|------|--------|
| 5.89     | 16   | 0.35   |
| 6.55     | 4622 | 99.65  |
| Sum      | 4638 | 100.00 |

**Figure S3.** Chiral HPLC traces for *racemic*-CL<sup>Me</sup>, (*S*)-CL<sup>Me</sup> and (*R*)-CL<sup>Me</sup> (see the Experimental section for details)



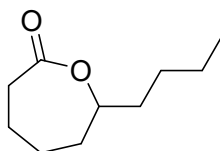

*rac* - DL

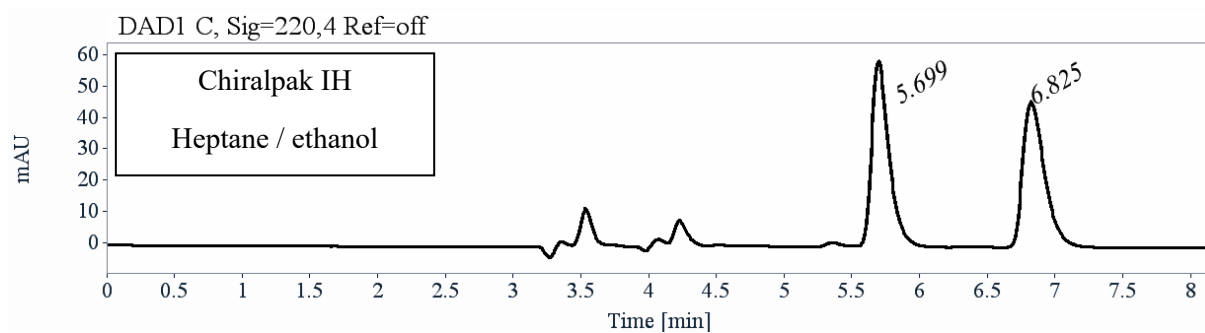

| RT [min] | Area | Area%  |
|----------|------|--------|
| 5.70     | 521  | 50.12  |
| 6.83     | 518  | 49.88  |
| Sum      | 1039 | 100.00 |

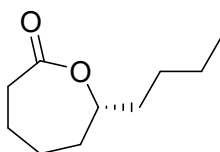

(*R*)-CL<sup>nBu</sup>

- First fraction: The first eluted enantiomer with ee > 99.5%

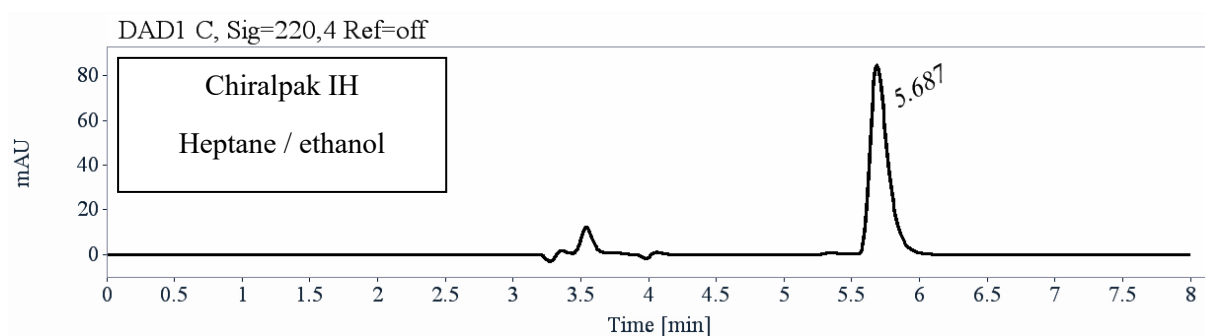

| RT [min] | Area | Area%  |
|----------|------|--------|
| 5.69     | 767  | 100.00 |
| Sum      | 767  | 100.00 |

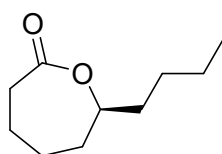

(*S*)-CL<sup>*n*Bu</sup>

- Second fraction: The second eluted enantiomer with ee > 99.5 %

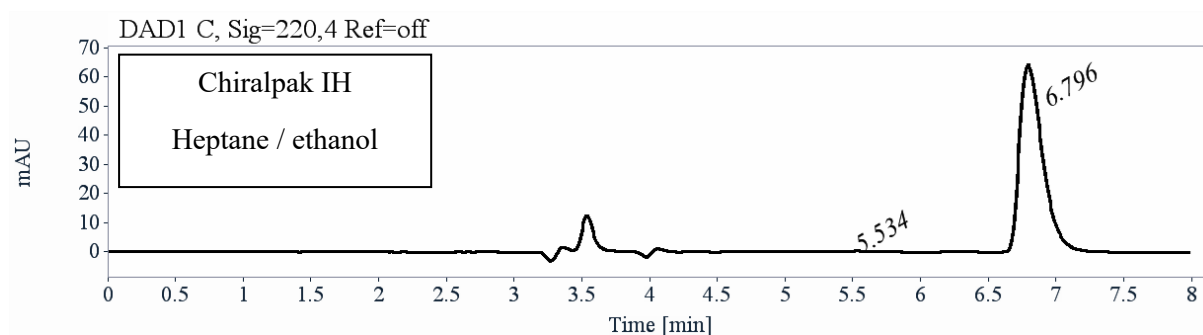

| RT [min] | Area | Area%  |
|----------|------|--------|
| 5.53     | 2    | 0.21   |
| 6.80     | 760  | 99.79  |
| Sum      | 762  | 100.00 |

**Figure S4.** Chiral HPLC traces for *racemic*-CL<sup>*n*Bu</sup>, (*R*)-CL<sup>*n*Bu</sup> and (*S*)-CL<sup>*n*Bu</sup> (see the Experimental section for details)

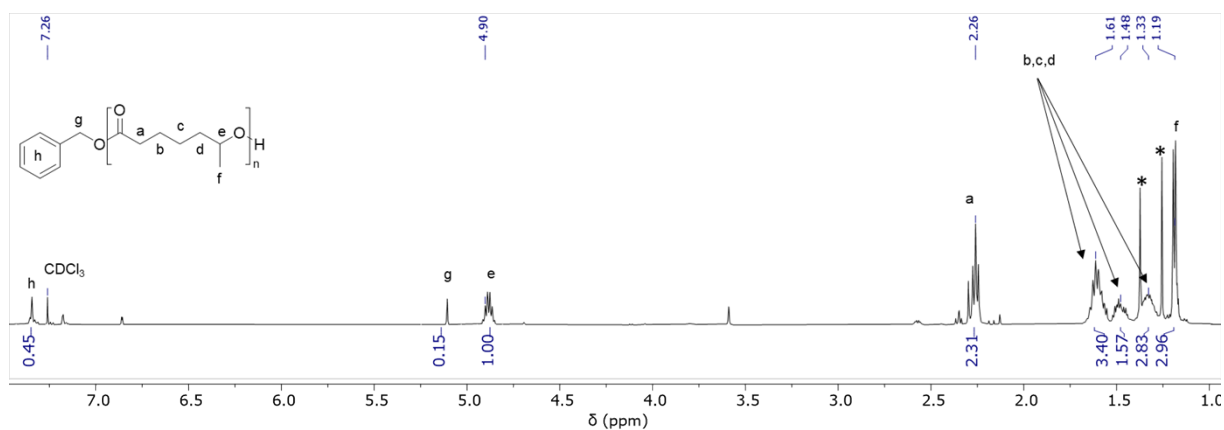

**Figure S5.**  $^1\text{H}$  NMR spectrum (500 MHz,  $\text{CDCl}_3$ , 25  $^\circ\text{C}$ ) of a PCL<sup>Me</sup> homopolymer prepared from the ROP of *rac*-CL<sup>Me</sup> (30 equiv) mediated by the **1a**/BnOH (1:1) catalyst system (Table S1, entry 1-105). \* stands for resonances of residual solvent and/or catalyst.

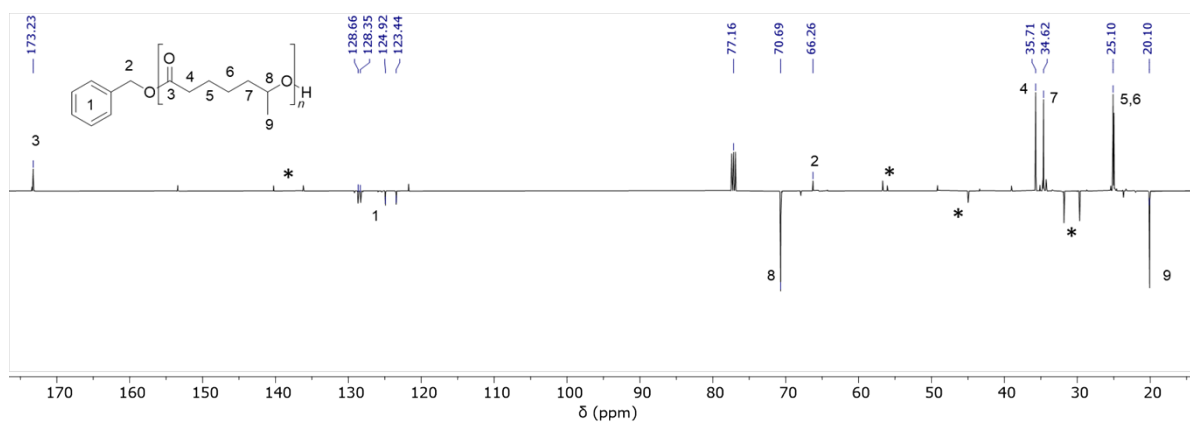

**Figure S6.** JMOD  $^{13}\text{C}\{^1\text{H}\}$  NMR spectrum (125 MHz,  $\text{CDCl}_3$ , 25  $^\circ\text{C}$ ) of a PCL<sup>Me</sup> homopolymer prepared from the ROP of *rac*-CL<sup>Me</sup> (30 equiv) by the **1a**/BnOH (1:1) catalyst system (Table S1, entry 1-105). \* stands for resonances of residual solvent and/or catalyst.

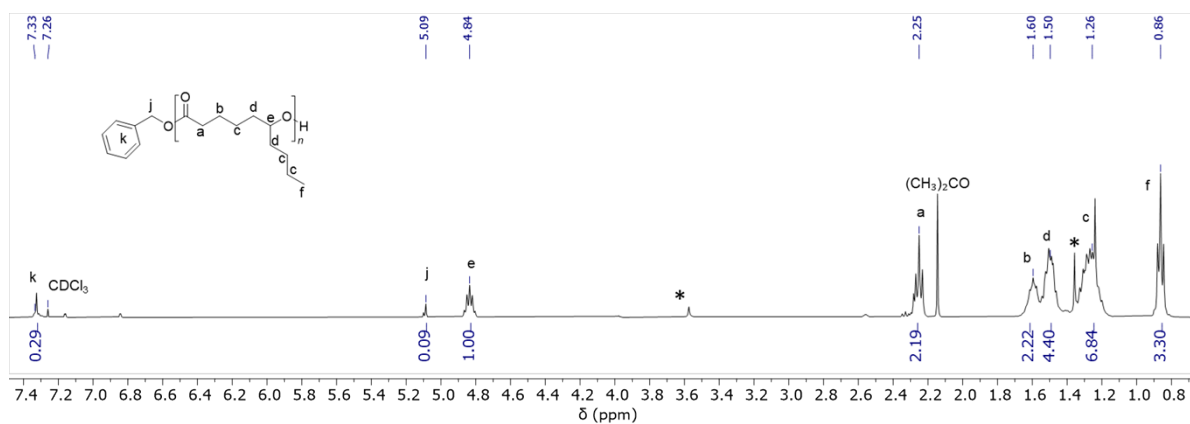

**Figure S7.**  $^1\text{H}$  NMR spectrum (500 MHz,  $\text{CDCl}_3$ , 25  $^\circ\text{C}$ ) of a  $\text{PCL}^{n\text{Bu}}$  homopolymer prepared from the ROP of  $\text{rac-CL}^{n\text{Bu}}$  (30 equiv) mediated by the **1a**/BnOH (1:1) catalyst system (Table S1, entry 1-107). \* stands for resonances of residual solvent and/or catalyst.

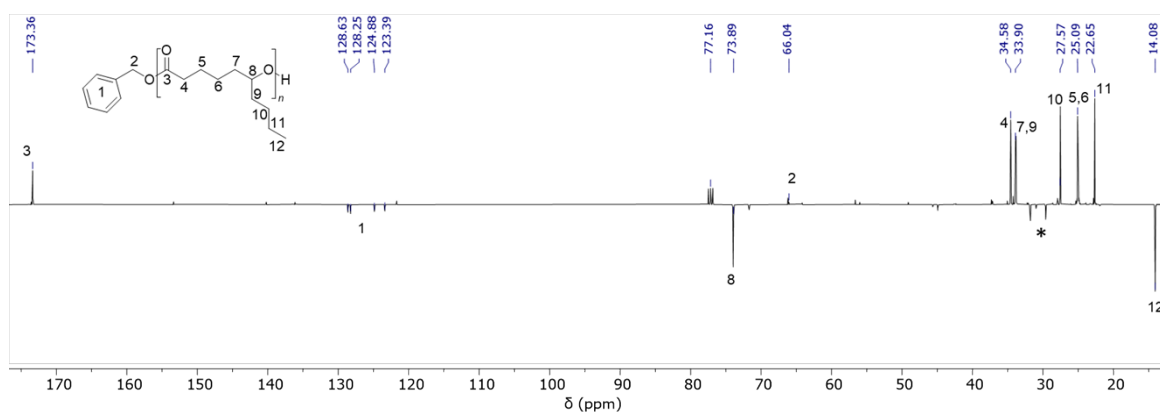

**Figure S8.** JMOC  $^{13}\text{C}\{^1\text{H}\}$  spectrum (500 MHz,  $\text{CDCl}_3$ , 25  $^\circ\text{C}$ ) of a  $\text{PCL}^{n\text{Bu}}$  homopolymer prepared from the ROP of  $\text{rac-CL}^{n\text{Bu}}$  (30 equiv) mediated by the **1a**/BnOH (1:1) catalyst system (Table S1, entry 1-107). \* stands for resonances of residual solvent and/or catalyst.

**Table S1.** ROP of *rac*-CL<sup>Me</sup> and *rac*-CL<sup>nBu</sup> mediated by the **1a**/BnOH, {BDI<sup>DIPP</sup>}Zn(NTMS<sub>2</sub>)/BnOH and KO<sup>t</sup>Bu catalyst systems.<sup>a</sup>

| Entry      | [CL <sup>R</sup> ] <sub>0</sub> <sup>b</sup><br>(eq vs. Y) | Catalyst           | Time<br>(min) | Conv.<br>[CL <sup>R</sup> ] <sub>0</sub><br>(%) <sup>c</sup> | M <sub>n,theo</sub> <sup>d</sup><br>(g.mol <sup>-1</sup> ) | M <sub>n,NMR</sub> <sup>e</sup><br>(g.mol <sup>-1</sup> ) | M <sub>n,SEC</sub> <sup>f</sup><br>(g.mol <sup>-1</sup> ) | D <sub>M</sub> <sup>f</sup> | T <sub>g</sub> <sup>g</sup><br>(°C) |
|------------|------------------------------------------------------------|--------------------|---------------|--------------------------------------------------------------|------------------------------------------------------------|-----------------------------------------------------------|-----------------------------------------------------------|-----------------------------|-------------------------------------|
| 1 / 1-105  | 30                                                         | <b>1a</b> /BnOH    | 180           | 100                                                          | 4000                                                       | 1500                                                      | 2700                                                      | 1.38                        | -45.9                               |
| R =<br>Me  | 2 / 1-117                                                  | Zn(BDI)/BnOH       | 120           | 100                                                          | 4000                                                       | 1800                                                      | 2650                                                      | 1.20                        | -52.6                               |
|            | 3 / 1-163                                                  | KO <sup>t</sup> Bu | 240           | 100                                                          | 7800                                                       | nd <sup>i</sup>                                           | nd <sup>h</sup>                                           | nd <sup>h</sup>             | nd <sup>h</sup>                     |
|            | 4 / 1-193                                                  | Zn(BDI)/BnOH       | 240           | 100                                                          | 7800                                                       | 4300                                                      | nd <sup>h</sup>                                           | nd <sup>h</sup>             | -47.7                               |
| 5 / 1-107  | 30                                                         | <b>1a</b> /BnOH    | 180           | 100                                                          | 5200                                                       | 3700                                                      | 4700                                                      | 1.15                        | -55.4                               |
| R =<br>nBu | 6 / 1-114                                                  | Zn(BDI)/BnOH       | 120           | 100                                                          | 5200                                                       | 5500                                                      | 5350                                                      | 1.17                        | -55.4                               |
|            | 7 / 1-155                                                  | KO <sup>t</sup> Bu | 300           | 100                                                          | 10300                                                      | <sup>i</sup>                                              | nd <sup>h</sup>                                           | nd <sup>h</sup>             | -54.8                               |
|            | 8 / 1-164                                                  | Zn(BDI)/BnOH       | 90            | 100                                                          | 10300                                                      | 7600                                                      | nd <sup>h</sup>                                           | nd <sup>h</sup>             | -56.0                               |

<sup>a</sup> Reactions performed with [CL<sup>Me</sup>]<sub>0</sub> = 1.0 M or [CL<sup>nBu</sup>]<sub>0</sub> = 1.0 M in toluene with [**1a**]/[BnOH]<sub>0</sub> = 1:1. <sup>b</sup> Monomer loading. <sup>c</sup> Conversion of CL<sup>Me</sup> as determined by <sup>1</sup>H NMR analysis of the crude reaction mixture. <sup>d</sup> Calculated according to M<sub>n,theo</sub> = [CL<sup>Me</sup>]<sub>0</sub>/[**1a**] × conv.(CL<sup>Me</sup>) × M(CL<sup>Me</sup>) + M(BnOH), with M(CL<sup>Me</sup>) = 128 g.mol<sup>-1</sup> and M(BnOH) = 108 g.mol<sup>-1</sup>. <sup>e</sup> Determined by <sup>1</sup>H NMR analysis of the isolated polymer, from the resonances of the terminal OBn group (refer to Experimental section). <sup>f</sup> Number-average molar mass (uncorrected) and dispersity (M<sub>w</sub>/M<sub>n</sub>) determined by SEC analysis in THF at 30 °C vs. polystyrene standards; <sup>g</sup> Glass transition temperature as determined by DSC analysis. <sup>h</sup> Not determined. <sup>i</sup> No chain-ends observed due to formation of cyclic polymer. \* starting from an enantiopure monomer.

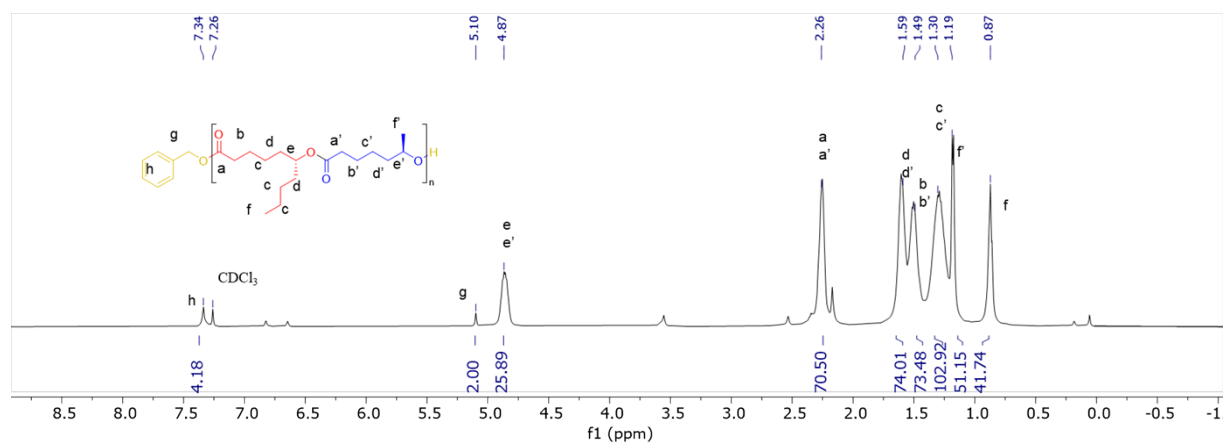

**Figure S9.**  $^1\text{H}$  NMR spectrum (400 MHz,  $\text{CDCl}_3$ , 25  $^\circ\text{C}$ ) of a  $\text{P}(\text{CL}^{\text{Me}}\text{-co-CL}^n\text{Bu})$  copolymer prepared from the ROCOP of a 1:1 mixture of  $(S)\text{-CL}^{\text{Me}}$  and  $(R)\text{-CL}^n\text{Bu}$  mediated by the **1b**/BnOH (1:1) catalyst system (Table 1, entry 6). \* stands for resonances of residual solvent and/or catalyst.

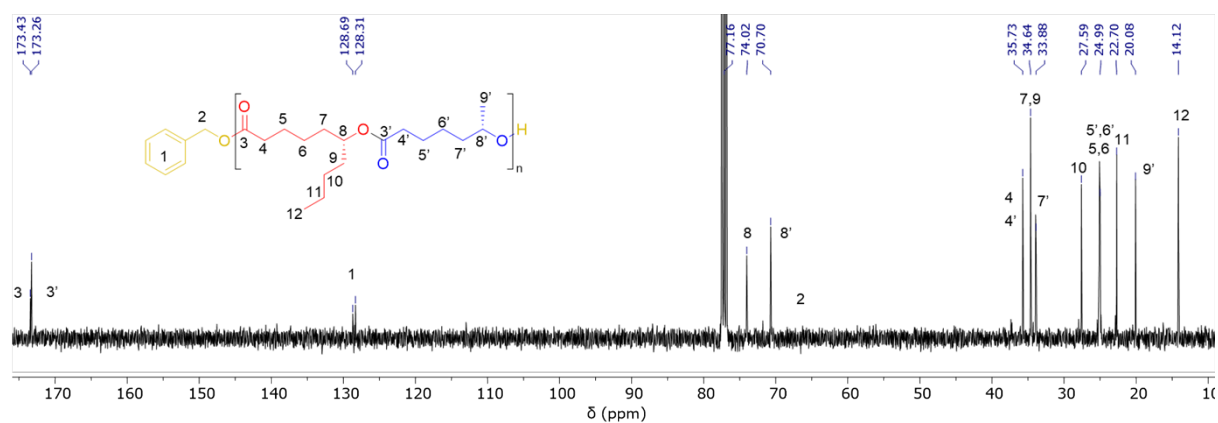

**Figure S10.**  $^{13}\text{C}\{^1\text{H}\}$  NMR spectrum (125 MHz,  $\text{CDCl}_3$ , 25  $^\circ\text{C}$ ) of a  $\text{P}(\text{CL}^{\text{Me}}\text{-co-CL}^n\text{Bu})$  copolymer prepared from the ROCOP of a 1:1 mixture of  $(S)\text{-CL}^{\text{Me}}$  and  $(R)\text{-CL}^n\text{Bu}$  (1:1) mediated by the **1b**/BnOH (1:1) catalyst system (Table 1, entry 6). \* stands for resonances of residual solvent and/or catalyst.

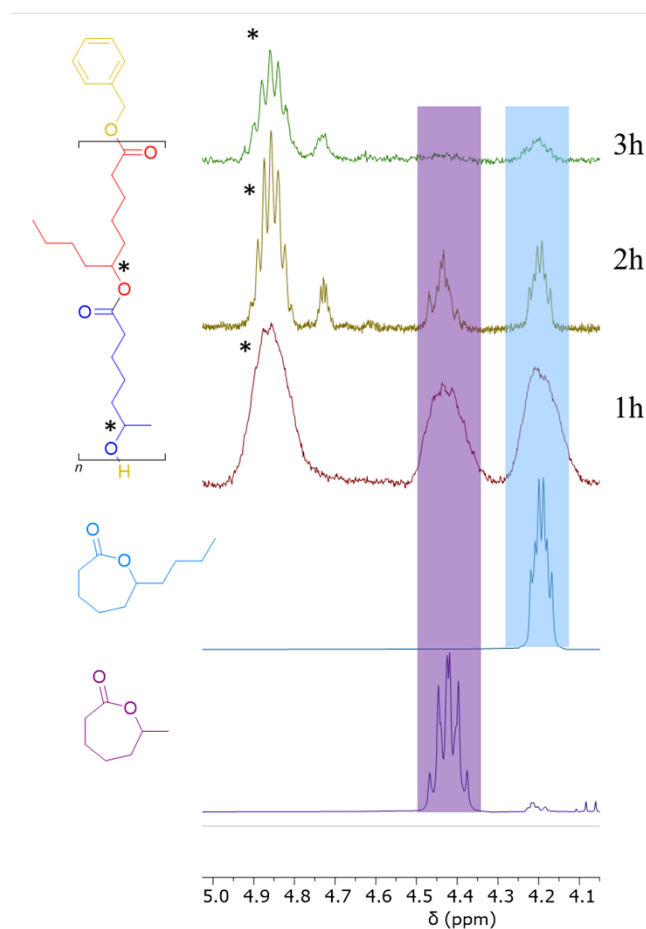

**Figure S11.** From bottom to top:  $^1\text{H}$  NMR (400 MHz,  $\text{CDCl}_3$ , 25  $^\circ\text{C}$ ) spectra of the starting comonomers;  $^1\text{H}$  NMR (400 MHz,  $\text{CDCl}_3$ , 25  $^\circ\text{C}$ ) spectra for the monitoring of the ROCOP of a 1:1 mixture of  $(R)$ - $\text{CL}^{n\text{Bu}}$  and  $(S)$ - $\text{CL}^{\text{Me}}$  mediated by the **1b**/BnOH (1:1) catalyst system at 20  $^\circ\text{C}$ . Reaction time = 1 h:  $\text{conv}(\text{CL}^{n\text{Bu}} / \text{CL}^{\text{Me}}) = 58$  and 62% respectively; ratio  $(\text{CL}^{n\text{Bu}} / \text{CL}^{\text{Me}}) = 1.14$ . Reaction time = 2 h:  $\text{conv}(\text{CL}^{n\text{Bu}} / \text{CL}^{\text{Me}}) = 71$  and 72%, respectively; ratio  $(\text{CL}^{n\text{Bu}} / \text{CL}^{\text{Me}}) = 1.05$ . Reaction time = 4 h:  $\text{conv}(\text{CL}^{n\text{Bu}} / \text{CL}^{\text{Me}}) = 90$  and 99%, respectively; ratio  $(\text{CL}^{n\text{Bu}} / \text{CL}^{\text{Me}}) = 10$ . \* stands for resonances of the copolymer.

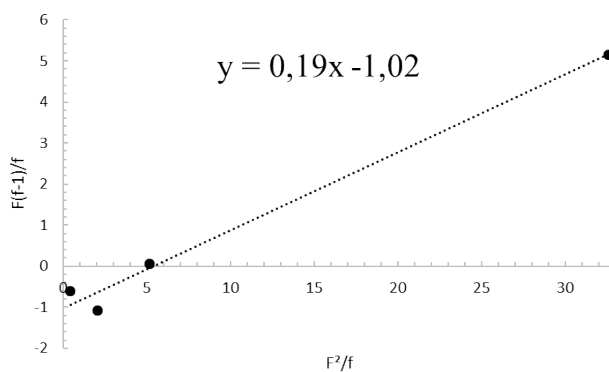

**Figure S12.** Fineman –Ross plot for the determination of monomer reactivity ratio of  $\text{CL}^{\text{Me}}$  and  $\text{CL}^{n\text{Bu}}$  in the copolymerization by the **1a**/BnOH (1:1) system in toluene at 20  $^\circ\text{C}$ .

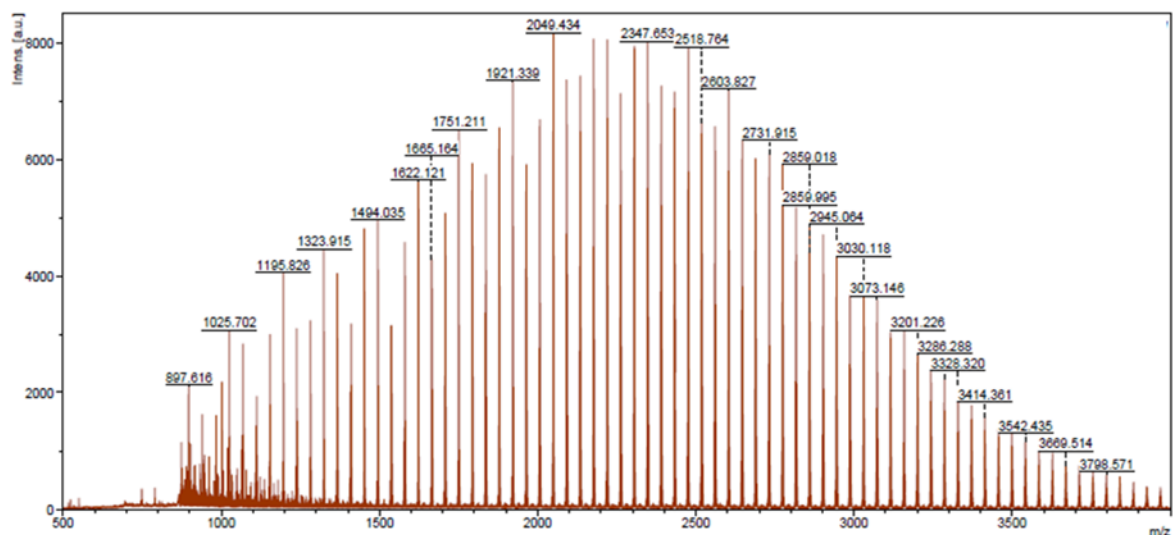

**Figure S13.** MALDI-ToF mass spectrum (DCTB matrix, ionized by  $\text{Na}^+$ ) of a  $\text{P}(\text{CL}^{\text{Me}}\text{-co-CL}^n\text{Bu})$  copolymer prepared by ROCOP of  $(S)\text{-CL}^{\text{Me}}$  and  $(R)\text{-CL}^n\text{Bu}$  (1:1) with the **1b**/BnOH catalyst system (Table 1, entry 6).

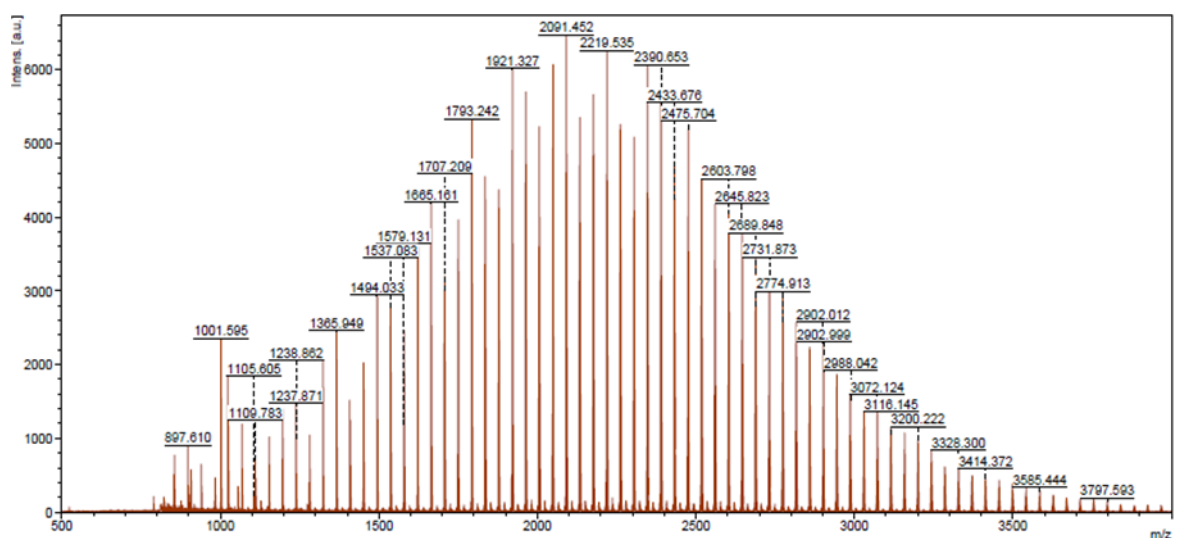

**Figure S14.** MALDI-ToF mass spectrum (DCTB matrix, ionized by  $\text{Na}^+$ ) of a  $\text{P}(\text{CL}^{\text{Me}}\text{-co-CL}^n\text{Bu})$  copolymer prepared by ROCOP of  $(S)\text{-CL}^{\text{Me}}$  and  $(R)\text{-CL}^n\text{Bu}$  (1:1) with the **1a**/BnOH catalyst system (Table 1, entry 2).



**Polymers**

Working Files (In a specific folder, only csv files inside to be processed please)

Starting materials (Formula w/o endings with spaces like C2 H4 O please)

monomer A  Typically RO-(monomers)-R'

monomer B  Initiator (I1) RO

monomer C  Terminal group (T1) R'

Length and families AxByCz w x+y+z <=50  
x or y or z <= 50

N max   cyclic is present

Initiators corresponding terminal group

|                             |                      |    |                      |
|-----------------------------|----------------------|----|----------------------|
| <input type="checkbox"/> I2 | <input type="text"/> | T2 | <input type="text"/> |
| <input type="checkbox"/> I3 | <input type="text"/> | T3 | <input type="text"/> |
| <input type="checkbox"/> I4 | <input type="text"/> | T4 | <input type="text"/> |
| <input type="checkbox"/> I5 | <input type="text"/> | T5 | <input type="text"/> |

Mass Spectrometry Na+ is always calculated in POS

Electrospray  MALDI  Na  H  -H+2Na

POS  NEG  withdraw of electron (+, or C+)

z=1  z<=3

mypolymers.IDNUM.YY.MM.DD.01.csv

z <= 3 only with +zH or+zNa or -zH no mixture

Data

Resolution  Max. Iso.  Compensation  %

PPM  Threshold  %

**Figure S15.** “Polymers” software for automatic generation of theoretical  $m/z$  peaks and assignment to experimental  $m/z$  mass peaks.

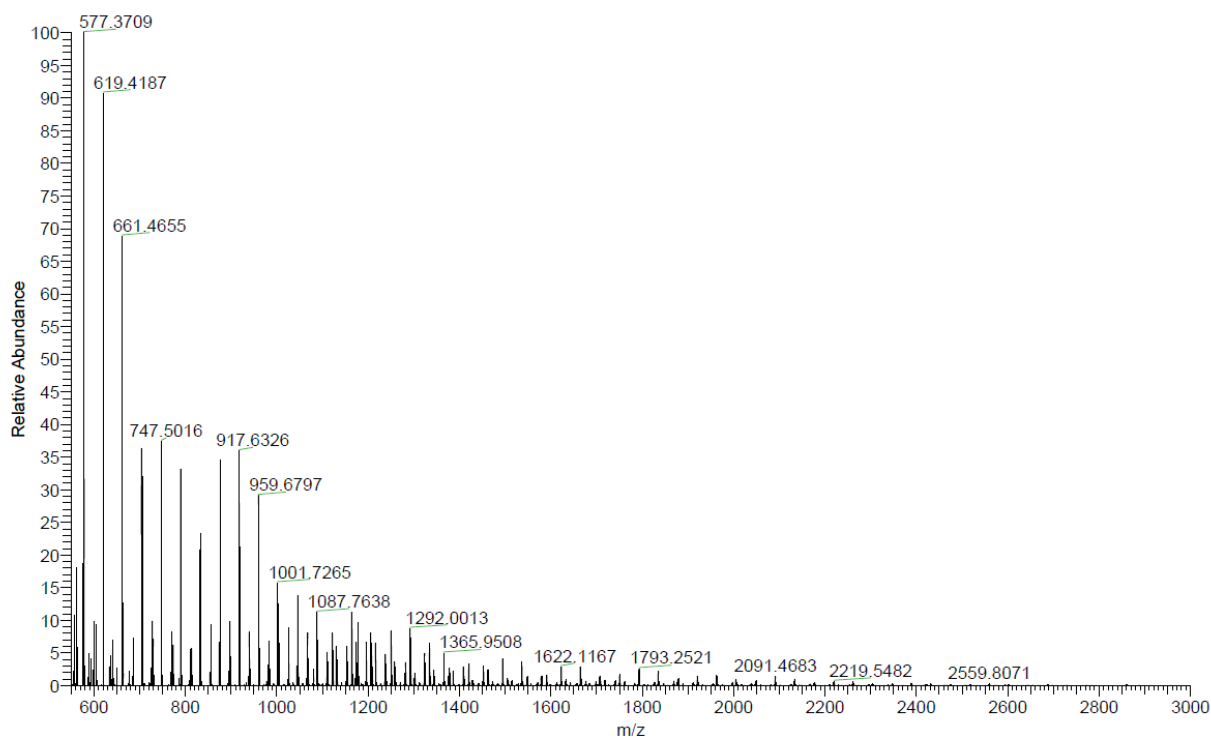

**Figure S16.** ESI-mass spectrum (solvent  $\text{CH}_2\text{Cl}_2$ ) of a  $\text{P}(\text{CL}^{\text{Me}}\text{-co-CL}^{\text{nBu}})$  copolymer prepared by ROCOP of a 1:1 mixture of (*S*)- $\text{CL}^{\text{Me}}$  and (*R*)- $\text{CL}^{\text{nBu}}$  with the **1a**/BnOH catalyst system (Table 1, entry 3).

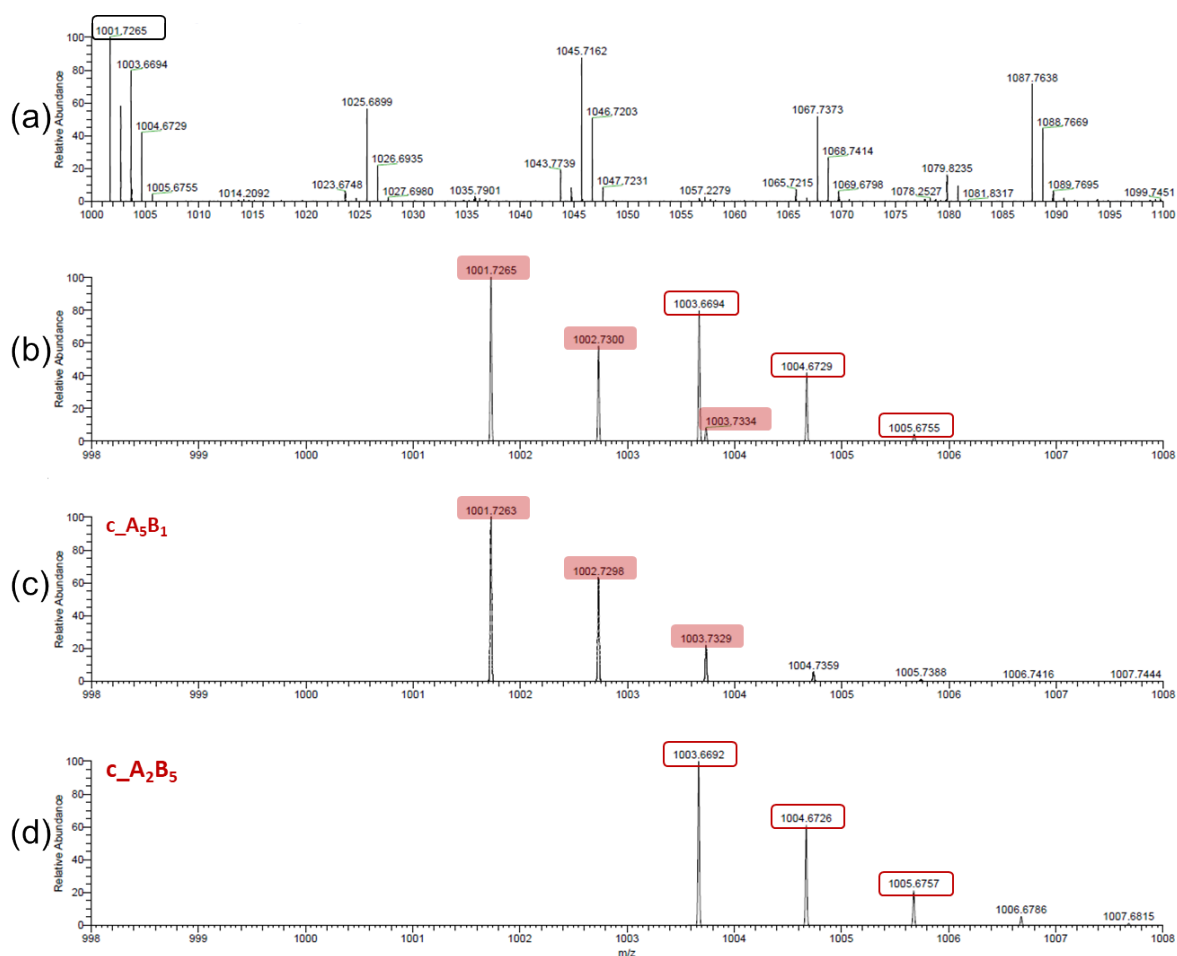

**Figure S17.** Details of the high resolution ESI mass spectra of a P(CL<sup>n</sup>Bu-co-CL<sup>Me</sup>) copolymer prepared by ROCOP of a 1:1 mixture of (*R*)-CL<sup>n</sup>Bu and (*S*)-CL<sup>Me</sup> with the **1a**/BnOH catalyst system (Table 1, entry 3), from top to bottom: (a) experimental spectrum (solvent: CH<sub>2</sub>Cl<sub>2</sub>) for  $m/z = 1000$ – $1100$ , (b) zoomed region for  $m/z = 998$ – $1008$ , showing resolved peaks for cyclic P[(CL<sup>n</sup>Bu)<sub>5</sub>-co-(CL<sup>Me</sup>)] ( $m/z_{\text{exp}}$  (all <sup>12</sup>C) = 1001.7265) and cyclic P[(CL<sup>n</sup>Bu)<sub>2</sub>-co-(CL<sup>Me</sup>)<sub>5</sub>] ( $m/z_{\text{exp}}$  (all <sup>12</sup>C) = 1003.6694); (c) calculated spectrum (isotopic pattern) for cyclic P[(CL<sup>n</sup>Bu)<sub>5</sub>-co-(CL<sup>Me</sup>)] ( $m/z_{\text{calcd}}$  (all <sup>12</sup>C) = 1001.7263); (d) calculated spectrum (isotopic pattern) for cyclic P[(CL<sup>n</sup>Bu)<sub>2</sub>-co-(CL<sup>Me</sup>)<sub>5</sub>] ( $m/z_{\text{calcd}}$  (all <sup>12</sup>C) = 1003.6692).

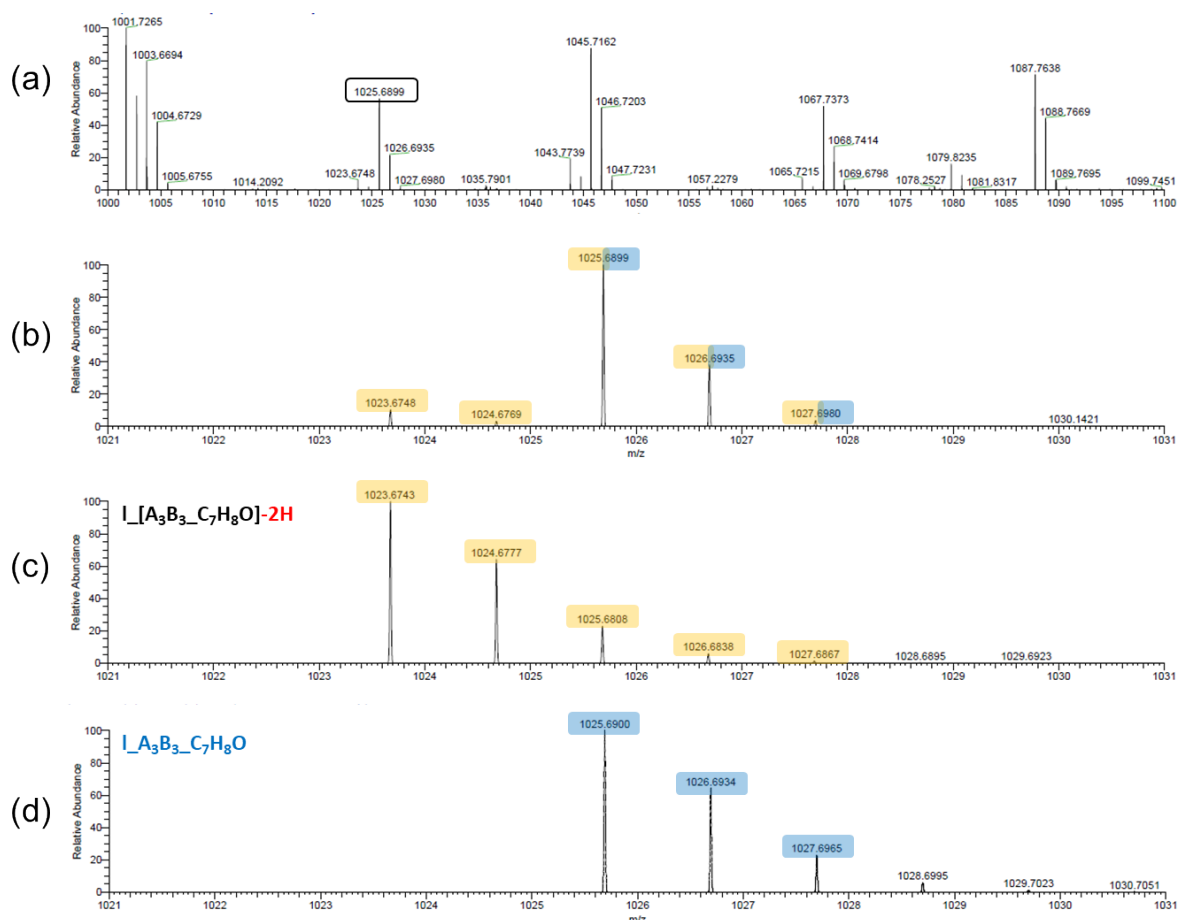

**Figure S18.** Details of the high resolution ESI mass spectra of a P(CL<sup>n</sup>Bu-co-CL<sup>Me</sup>) copolymer prepared by ROCOP of a 1:1 mixture of (*R*)-CL<sup>n</sup>Bu and (*S*)-CL<sup>Me</sup> with the **1a**/BnOH catalyst system (Table 1, entry 3), from top to bottom: (a) experimental spectrum (solvent: CH<sub>2</sub>Cl<sub>2</sub>) for *m/z* = 1000–1100, (b) zoomed region for *m/z* = 1021–1031, showing resolved peaks for linear P[(CL<sup>n</sup>Bu)<sub>3</sub>-co-(CL<sup>Me</sup>)<sub>3</sub>]-C<sub>7</sub>H<sub>8</sub>O – 2H (*m/z*<sub>exp</sub> (all <sup>12</sup>C) = 1023.6748) and linear P[(CL<sup>n</sup>Bu)<sub>3</sub>-co-(CL<sup>Me</sup>)<sub>3</sub>]-C<sub>7</sub>H<sub>8</sub>O (*m/z*<sub>exp</sub> (all <sup>12</sup>C) = 1025.6899); (c) calculated spectrum (isotopic pattern) for cyclic linear P[(CL<sup>n</sup>Bu)<sub>3</sub>-co-(CL<sup>Me</sup>)<sub>3</sub>]-C<sub>7</sub>H<sub>8</sub>O – 2H (*m/z*<sub>calcd</sub> (all <sup>12</sup>C) = 1023.6743); (d) calculated spectrum (isotopic pattern) for linear P[(CL<sup>n</sup>Bu)<sub>3</sub>-co-(CL<sup>Me</sup>)<sub>3</sub>]-C<sub>7</sub>H<sub>8</sub>O (*m/z*<sub>calcd</sub> (all <sup>12</sup>C) = 1025.6900).

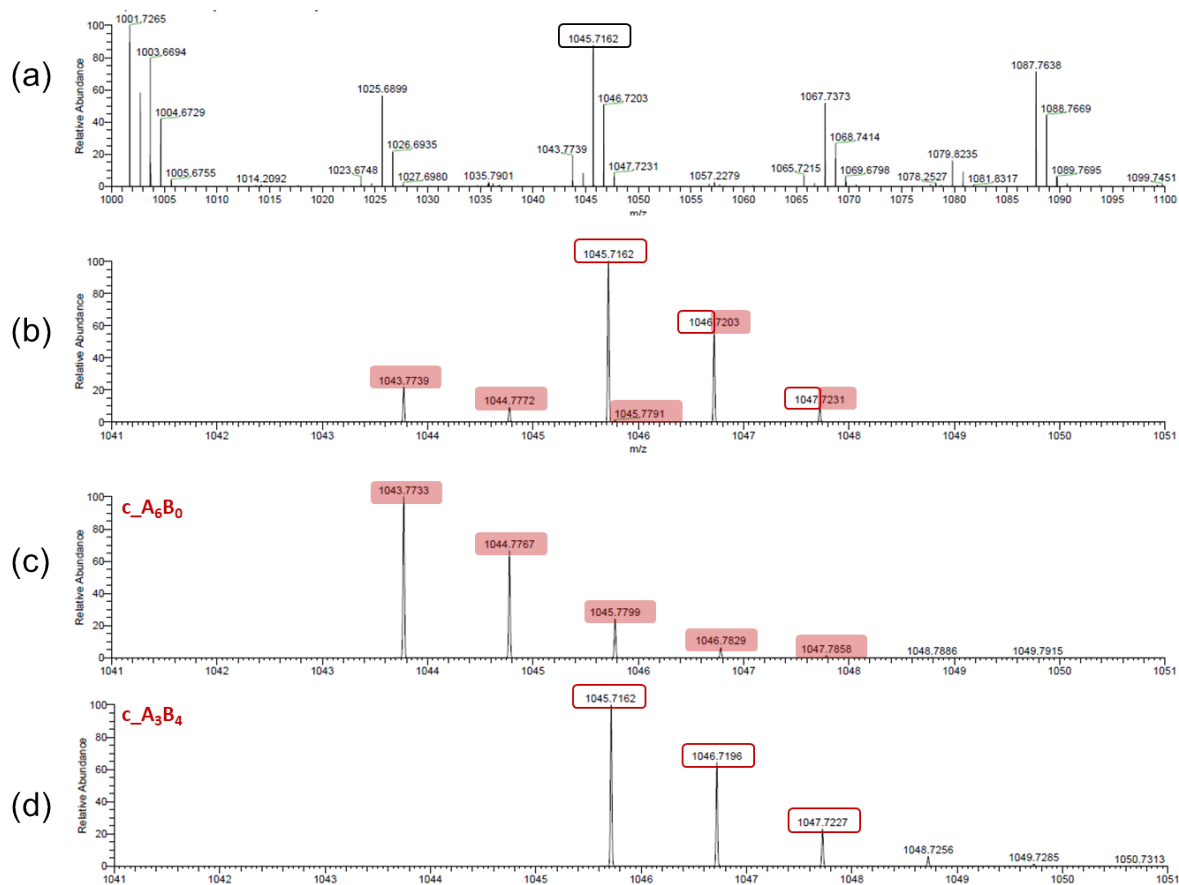

**Figure S19.** Details of the high resolution ESI mass spectra of a P(CL<sup>n</sup>Bu-co-CL<sup>Me</sup>) copolymer prepared by ROCOP of a 1:1 mixture of (*R*)-CL<sup>n</sup>Bu and (*S*)-CL<sup>Me</sup> with the **1a**/BnOH catalyst system (Table 1, entry 3), from top to bottom: (a) experimental spectrum (solvent: CH<sub>2</sub>Cl<sub>2</sub>) for  $m/z = 1000$ – $1100$ , (b) zoomed region for  $m/z = 1041$ – $1051$ , showing resolved peaks for cyclic P[(CL<sup>n</sup>Bu)<sub>6</sub>-co-(CL<sup>Me</sup>)<sub>0</sub>] ( $m/z_{\text{exp}}$  (all <sup>12</sup>C) = 1043.7739) and cyclic P[(CL<sup>n</sup>Bu)<sub>3</sub>-co-(CL<sup>Me</sup>)<sub>4</sub>] ( $m/z_{\text{exp}}$  (all <sup>12</sup>C) = 1045.7162); (c) calculated spectrum (isotopic pattern) for cyclic P[(CL<sup>n</sup>Bu)<sub>6</sub>-co-(CL<sup>Me</sup>)<sub>0</sub>] ( $m/z_{\text{calcd}}$  (all <sup>12</sup>C) = 1043.7733); (d) calculated spectrum (isotopic pattern) for cyclic P[(CL<sup>n</sup>Bu)<sub>3</sub>-co-(CL<sup>Me</sup>)<sub>4</sub>] ( $m/z_{\text{calcd}}$  (all <sup>12</sup>C) = 1045.7162).

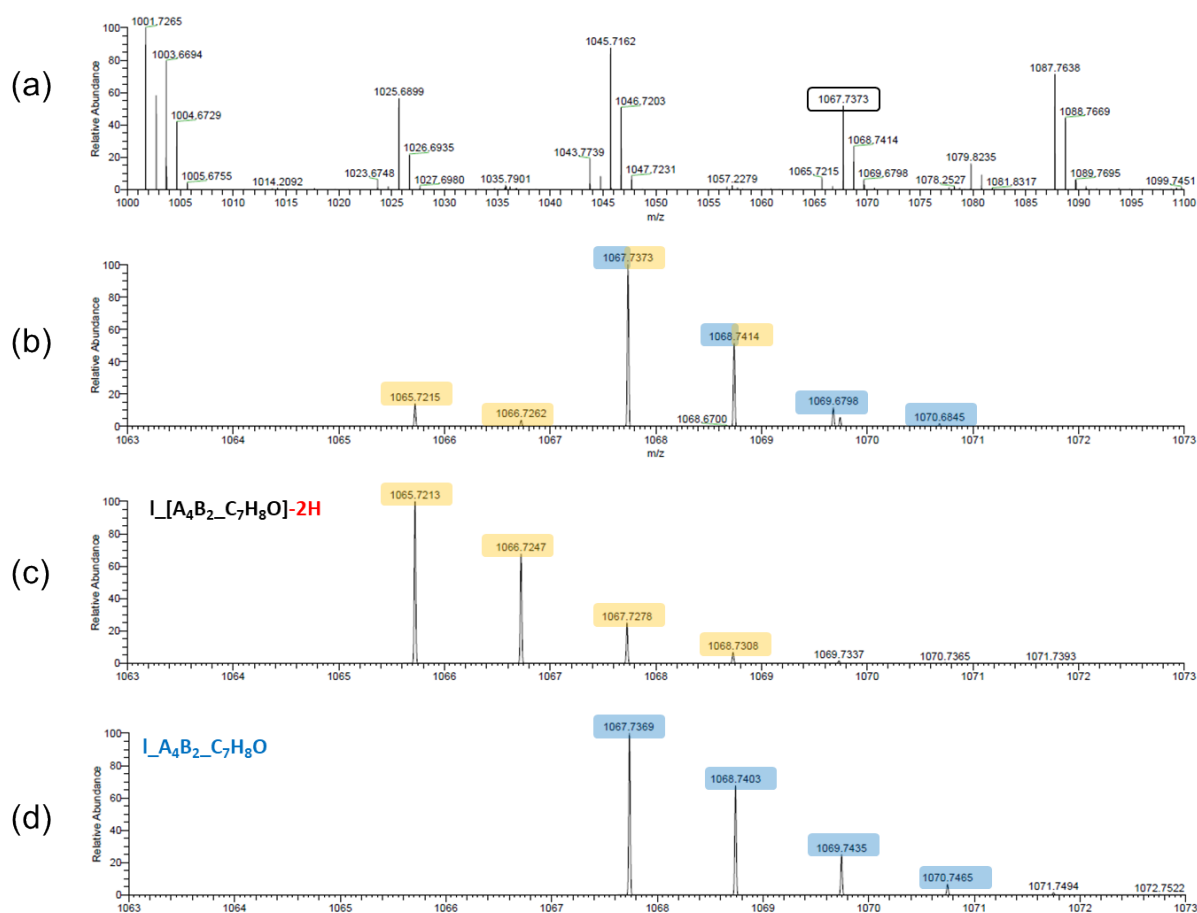

**Figure S20.** Details of the high resolution ESI mass spectra of a P(CL<sup>n</sup>Bu-co-CL<sup>Me</sup>) copolymer prepared by ROCOP of a 1:1 mixture of (*R*)-CL<sup>n</sup>Bu and (*S*)-CL<sup>Me</sup> with the **1a**/BnOH catalyst system (Table 1, entry 3), from top to bottom: (a) experimental spectrum (solvent: CH<sub>2</sub>Cl<sub>2</sub>) for *m/z* = 1000–1100, (b) zoomed region for *m/z* = 1063–1073, showing resolved peaks for linear P[(CL<sup>n</sup>Bu)<sub>4</sub>-co-(CL<sup>Me</sup>)<sub>2</sub>]-C<sub>7</sub>H<sub>8</sub>O – 2H (*m/z*<sub>exp</sub> (all <sup>12</sup>C) = 1065.7215) and linear P[(CL<sup>n</sup>Bu)<sub>4</sub>-co-(CL<sup>Me</sup>)<sub>2</sub>]-C<sub>7</sub>H<sub>8</sub>O (*m/z*<sub>exp</sub> (all <sup>12</sup>C) = 1067.7373); (c) calculated spectrum (isotopic pattern) for cyclic linear P[(CL<sup>n</sup>Bu)<sub>4</sub>-co-(CL<sup>Me</sup>)<sub>2</sub>]-C<sub>7</sub>H<sub>8</sub>O – 2H (*m/z*<sub>calcd</sub> (all <sup>12</sup>C) = 1065.7213); (d) calculated spectrum (isotopic pattern) for linear P[(CL<sup>n</sup>Bu)<sub>4</sub>-co-(CL<sup>Me</sup>)<sub>2</sub>]-C<sub>7</sub>H<sub>8</sub>O (*m/z*<sub>calcd</sub> (all <sup>12</sup>C) = 1067.7369).

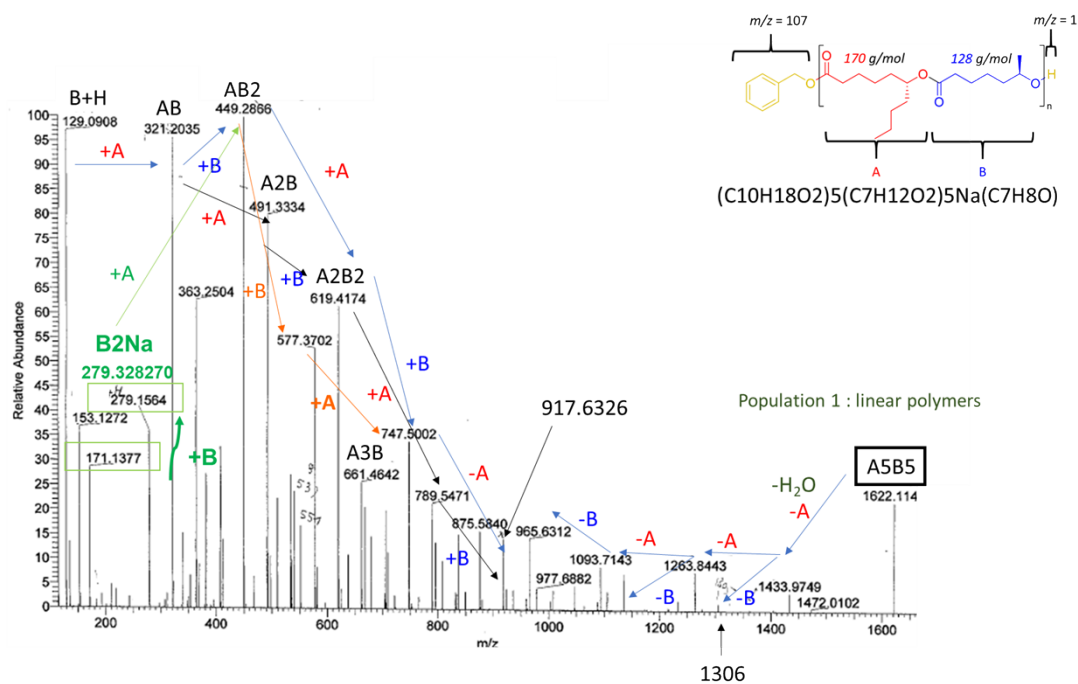

**Figure S21.** MS/MS fragmentation ESI mass spectrum of the ion  $m/z = 1622$  of a  $P(CL^{Me}\text{-}co\text{-}CL^{nBu})$  copolymer prepared by ROCOP of a 1:1 mixture of  $(S)\text{-}CL^{Me}$  and  $(R)\text{-}CL^{nBu}$  with the **1a**/BnOH catalyst system (Table 1, entry 3).

**Table S2.** Comparison of theoretical vs. experimental ESI-MS peaks for a P(CL<sup>nBu</sup>-co-CL<sup>Me</sup>) copolymer (Table 1, entry 3) for *m/z* values in the range 200–1800. A: stands for CL<sup>nBu</sup> and *x* for the number of A units in the polymer chain, B: stands for CL<sup>Me</sup> and *y* for the number of B units in the polymer chain. All non-assigned peaks or beyond the range are excluded from that table.

| <i>m/z</i> theoretical | Interpretation AxBy | Raw Formula  | Population | <i>x</i> | <i>y</i> | <i>x+y</i> | <i>m/z</i> experimental HR-ESI | Erreur (PPM) HR-ESI | Absolute Intensity ESI | <i>m/z</i> experimental MALDI-TOF | Erreur (PPM) MALDI | Absolute Intensity MALDI-TOF |
|------------------------|---------------------|--------------|------------|----------|----------|------------|--------------------------------|---------------------|------------------------|-----------------------------------|--------------------|------------------------------|
| 619,4180               | c A2B2              | C34H60O8Na   | Cyclic     | 2        | 2        | 4          | 619,4187                       | 1,06                | 6306631,5              | 619,4209122                       | 4,635268226        | 2638                         |
| 641,4388               | l A3B0 C7H8O        | C37H62O7Na   | C7H7O H    | 3        | 0        | 3          | 641,4397                       | 1,45                | 485720,6               | 641,4464819                       | 12,02131196        | 2099                         |
| 661,4650               | c A3B1              | C37H66O8Na   | Cyclic     | 3        | 1        | 4          | 661,4655                       | 0,77                | 4867532,5              | 661,4697684                       | 7,222499419        | 3666                         |
| 685,4286               | l A1B3 C7H8O        | C38H62O9Na   | C7H7O H    | 1        | 3        | 4          | 685,4289                       | 0,44                | 496851,2               | 685,4387311                       | 14,77928334        | 750                          |
| 703,5119               | c A4B0              | C40H72O8Na   | Cyclic     | 4        | 0        | 4          | 703,5117                       | 0,34                | 2556988,5              | 703,5125391                       | 0,850132706        | 3069                         |
| 705,4548               | c A1B4              | C38H66O10Na  | Cyclic     | 1        | 4        | 5          | 705,4545                       | 0,46                | 2196333,3              | 705,4585526                       | 5,289620201        | 628                          |
| 727,4756               | l A2B2 C7H8O        | C41H68O9Na   | C7H7O H    | 2        | 2        | 4          | 727,4761                       | 0,75                | 693295,1               | 727,4750194                       | 0,730751202        | 1155                         |
| 747,5018               | c A2B3              | C41H72O10Na  | Cyclic     | 2        | 3        | 5          | 747,5016                       | 0,23                | 2573951,3              | 747,4993582                       | 3,227806141        | 1478                         |
| 769,5225               | l A3B1 C7H8O        | C44H74O9Na   | C7H7O H    | 3        | 1        | 4          | 769,5229                       | 0,52                | 574137                 | 769,5241934                       | 2,199265591        | 1958                         |
| 789,5487               | c A3B2              | C44H78O10Na  | Cyclic     | 3        | 2        | 5          | 789,5488                       | 0,1                 | 2297048,3              | 789,5467073                       | 2,550451753        | 2560                         |
| 811,5695               | l A4B0 C7H8O        | C47H80O9Na   | C7H7O H    | 4        | 0        | 4          | 811,5696                       | 0,18                | 395667,6               | 811,5678006                       | 2,033587107        | 2064                         |
| 831,5957               | c A4B1              | C47H84O10Na  | Cyclic     | 4        | 1        | 5          | 831,5955                       | 0,21                | 1460930,4              | 831,5929689                       | 3,249295153        | 2489                         |
| 855,5593               | l A2B3 C7H8O        | C48H80O11Na  | C7H7O H    | 2        | 3        | 5          | 855,5594                       | 0,14                | 646397,9               | 855,5558882                       | 3,96560253         | 933                          |
| 873,6426               | c A5B0              | C50H90O10Na  | Cyclic     | 5        | 0        | 5          | 873,6428                       | 0,2                 | 453784,1               | 873,6378063                       | 5,11060365         | 924                          |
| 875,5855               | c A2B4              | C48H84O12Na  | Cyclic     | 2        | 4        | 6          | 875,5851                       | 0,46                | 2424710,5              | 875,5818101                       | 4,215372489        | 925                          |
| 897,6062               | l A3B2 C7H8O        | C51H86O11Na  | C7H7O H    | 3        | 2        | 5          | 897,6064                       | 0,19                | 678449,1               | 897,6007829                       | 6,069565943        | 1538                         |
| 917,6325               | c A3B3              | C51H90O12Na  | Cyclic     | 3        | 3        | 6          | 917,6326                       | 0,16                | 2543615,5              | 917,6305572                       | 2,063836173        | 1472                         |
| 939,6532               | l A4B1 C7H8O        | C54H92O11Na  | C7H7O H    | 4        | 1        | 5          | 939,6535                       | 0,34                | 579489,4               | 939,653184                        | 0,003215502        | 2940                         |
| 959,6794               | c A4B2              | C54H96O12Na  | Cyclic     | 4        | 2        | 6          | 959,6797                       | 0,31                | 2045526,5              | 959,671023                        | 2,395272852        | 1696                         |
| 981,7001               | l A5B0 C7H8O        | C57H98O11Na  | C7H7O H    | 5        | 0        | 5          | 981,6997                       | 0,44                | 212725,3               | 981,6979628                       | 2,208639384        | 2016                         |
| 983,6430               | l A2B4 C7H8O        | C55H92O13Na  | C7H7O H    | 2        | 4        | 6          | 983,6426                       | 0,42                | 466782,6               | 983,6403726                       | 2,682298859        | 713                          |
| 1001,7264              | c A5B1              | C57H102O12Na | Cyclic     | 5        | 1        | 6          | 1001,7265                      | 0,15                | 1080027,5              | 1001,727785                       | 1,431176302        | 1421                         |
| 1003,6692              | c A2B5              | C55H96O14Na  | Cyclic     | 2        | 5        | 7          | 1003,6694                      | 0,17                | 862981,1               | 1003,65947                        | 9,725776245        | 614                          |
| 1025,6900              | l A3B3 C7H8O        | C58H98O13Na  | C7H7O H    | 3        | 3        | 6          | 1025,6899                      | 0,06                | 608170,3               | 1025,685443                       | 4,404456609        | 1609                         |
| 1043,7733              | c A6B0              | C60H108O12Na | Cyclic     | 6        | 0        | 6          | 1043,7739                      | 0,57                | 208898,2               | 1043,766152                       | 6,849451662        | 298                          |
| 1045,7162              | c A3B4              | C58H102O14Na | Cyclic     | 3        | 4        | 7          | 1045,7162                      | 0,02                | 949886,9               | 1045,714404                       | 1,699239105        | 1098                         |
| 1067,7369              | l A4B2 C7H8O        | C61H104O13Na | C7H7O H    | 4        | 2        | 6          | 1067,7373                      | 0,36                | 558374,5               | 1067,734004                       | 2,722872025        | 3041                         |
| 1087,7631              | c A4B3              | C61H108O14Na | Cyclic     | 4        | 3        | 7          | 1087,7638                      | 0,62                | 788434,4               | 1087,75637                        | 6,215139708        | 1579                         |
| 1109,7839              | l A5B1 C7H8O        | C64H110O13Na | C7H7O H    | 5        | 1        | 6          | 1109,784                       | 0,13                | 351197,5               | 1109,779651                       | 3,793666763        | 3651                         |
| 1129,8101              | c A5B2              | C64H114O14Na | Cyclic     | 5        | 2        | 7          | 1129,8105                      | 0,37                | 411308,2               | 1129,802735                       | 6,502269313        | 1233                         |
| 1153,7737              | l A3B4 C7H8O        | C65H110O15Na | C7H7O H    | 3        | 4        | 7          | 1153,7739                      | 0,18                | 408306,7               | 1153,768429                       | 4,560716281        | 1578                         |
| 1171,8570              | c A6B1              | C67H120O14Na | Cyclic     | 6        | 1        | 7          | 1171,8582                      | 1                   | 76918,2                | 1171,850544                       | 5,535436594        | 678                          |
| 1173,7999              | c A3B5              | C65H114O16Na | Cyclic     | 3        | 5        | 8          | 1173,801                       | 0,93                | 453022,8               | 1173,795824                       | 3,481656988        | 919                          |
| 1195,8206              | l A4B3 C7H8O        | C68H116O15Na | C7H7O H    | 4        | 3        | 7          | 1195,8211                      | 0,38                | 459051,6               | 1195,813165                       | 6,251802363        | 3403                         |
| 1215,8469              | c A4B4              | C68H120O16Na | Cyclic     | 4        | 4        | 8          | 1215,8471                      | 0,2                 | 453720,5               | 1215,839158                       | 6,335628856        | 1246                         |
| 1237,8676              | l A5B2 C7H8O        | C71H122O15Na | C7H7O H    | 5        | 2        | 7          | 1237,8672                      | 0,32                | 337771,8               | 1237,860334                       | 5,862396448        | 4954                         |
| 1257,8938              | c A5B3              | C71H126O16Na | Cyclic     | 5        | 3        | 8          | 1257,8944                      | 0,47                | 253078,7               | 1257,882093                       | 9,315650105        | 1442                         |
| 1279,9145              | l A6B1 C7H8O        | C74H128O15Na | C7H7O H    | 6        | 1        | 7          | 1279,9147                      | 0,12                | 130310,8               | 1279,905874                       | 6,771300552        | 4127                         |
| 1281,8574              | l A3B5 C7H8O        | C72H122O17Na | C7H7O H    | 3        | 5        | 8          | 1281,8567                      | 0,56                | 244319,7               | 1281,880635                       | 18,10985424        | 1905                         |
| 1299,9408              | c A6B2              | C74H132O16Na | Cyclic     | 6        | 2        | 8          | 1299,94                        | 0,59                | 75080,4                | 1299,933508                       | 5,579320547        | 1132                         |
| 1301,8836              | c A3B6              | C72H126O18Na | Cyclic     | 3        | 6        | 9          | 1301,8841                      | 0,35                | 132025                 | 1301,894979                       | 8,708942305        | 670                          |
| 1323,9044              | l A4B4 C7H8O        | C75H128O17Na | C7H7O H    | 4        | 4        | 8          | 1323,9037                      | 0,51                | 344210,5               | 1323,891908                       | 9,413562936        | 3681                         |
| 1343,9306              | c A4B5              | C75H132O18Na | Cyclic     | 4        | 5        | 9          | 1343,9307                      | 0,08                | 164776,5               | 1343,92318                        | 5,514457475        | 1237                         |
| 1365,9513              | l A5B3 C7H8O        | C78H134O17Na | C7H7O H    | 5        | 3        | 8          | 1365,9508                      | 0,38                | 348090,8               | 1365,935234                       | 11,77684624        | 6024                         |
| 1385,9775              | c A5B4              | C78H138O18Na | Cyclic     | 5        | 4        | 9          | 1385,977                       | 0,39                | 153601,6               | 1385,961438                       | 11,61829447        | 1518                         |
| 1407,9983              | l A6B2 C7H8O        | C81H140O17Na | C7H7O H    | 6        | 2        | 8          | 1407,9964                      | 1,33                | 197370,3               | 1407,984568                       | 9,731936579        | 6712                         |
| 1409,9412              | l A3B6 C7H8O        | C79H134O19Na | C7H7O H    | 3        | 6        | 9          | 1409,9409                      | 0,18                | 98665,2                | 1409,971772                       | 21,71790733        | 2641                         |
| 1428,0245              | c A6B3              | C81H144O18Na | Cyclic     | 6        | 3        | 9          | 1428,0234                      | 0,76                | 53733,2                | 1428,01104                        | 9,419649708        | 1161                         |
| 1450,0452              | l A7B1 C7H8O        | C84H146O17Na | C7H7O H    | 7        | 1        | 8          | 1450,0472                      | 1,36                | 42270,5                | 1450,030103                       | 10,42602319        | 3382                         |
| 1451,9881              | l A4B5 C7H8O        | C82H140O19Na | C7H7O H    | 4        | 5        | 9          | 1451,9868                      | 0,9                 | 216783,5               | 1451,990387                       | 1,574424404        | 3552                         |
| 1494,0351              | l A5B4 C7H8O        | C85H146O19Na | C7H7O H    | 5        | 4        | 9          | 1494,0331                      | 1,31                | 286080                 | 1494,014932                       | 13,46639192        | 6146                         |
| 1514,0613              | c A5B5              | C85H150O20Na | Cyclic     | 5        | 5        | 10         | 1514,0596                      | 1,1                 | 47504                  | 1514,042471                       | 12,41678008        | 1049                         |
| 1536,0820              | l A6B3 C7H8O        | C88H152O19Na | C7H7O H    | 6        | 3        | 9          | 1536,0811                      | 0,59                | 246633,4               | 1536,058751                       | 15,13588187        | 7607                         |

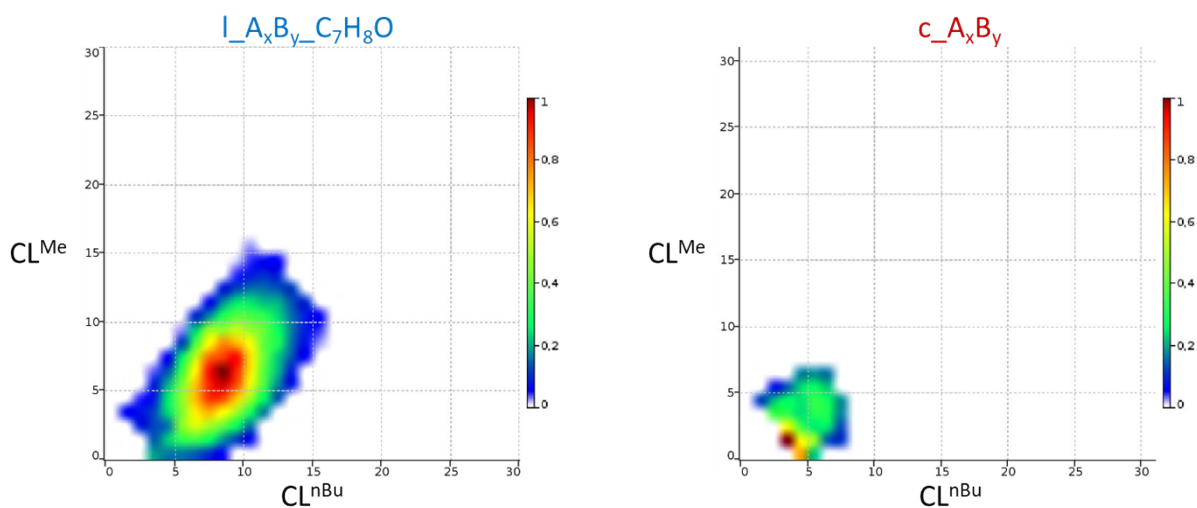

**Figure S22.** Contour-plots generated by the COCONUT software<sup>i</sup> from MALDI-ToF MS data of a  $P(\text{CL}^{n\text{Bu}})_x\text{-co-}(\text{CL}^{\text{Me}})_y$  copolymer (Left: linear population; Right: cyclic population) (Table 1, entry 3).

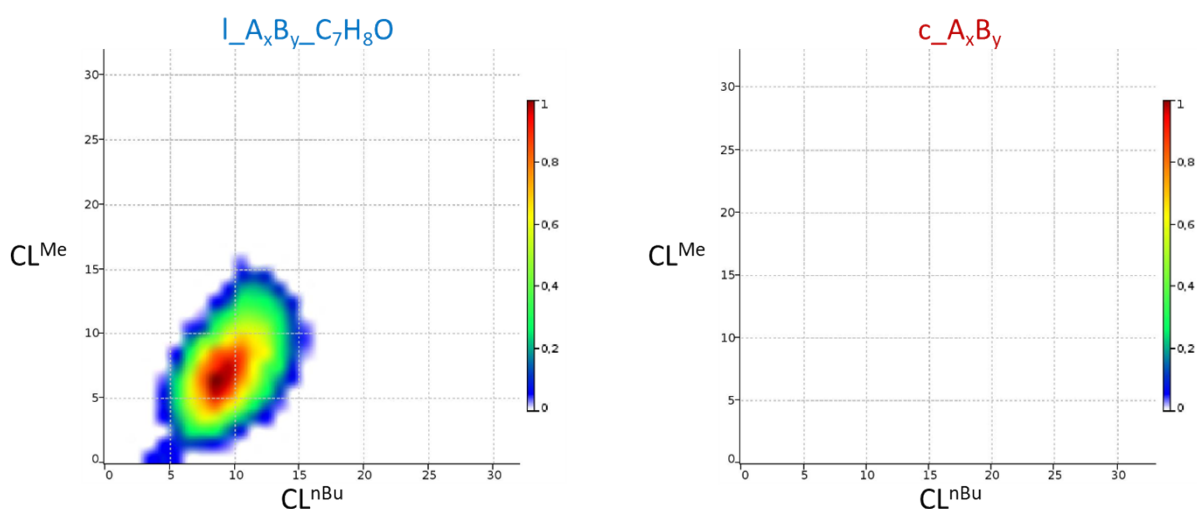

**Figure S23.** Contour-plots generated by the COCONUT<sup>i</sup> software from MALDI-ToF MS data of a  $P(\text{CL}^{n\text{Bu}})_x\text{-co-}(\text{CL}^{\text{Me}})_y$  copolymer (Left: linear population; Right: cyclic population) (Table 1, entry 1).

<sup>i</sup> M. S. Engler, S. Crotty, M. J. Barthel, C. Pietsch, K. Knop, U. S. Schubert, S. Böcker, COCONUT- An efficient tool for estimating copolymer compositions from mass spectra. *Anal. Chem.*, **2015**, *87*, 5223-5231.



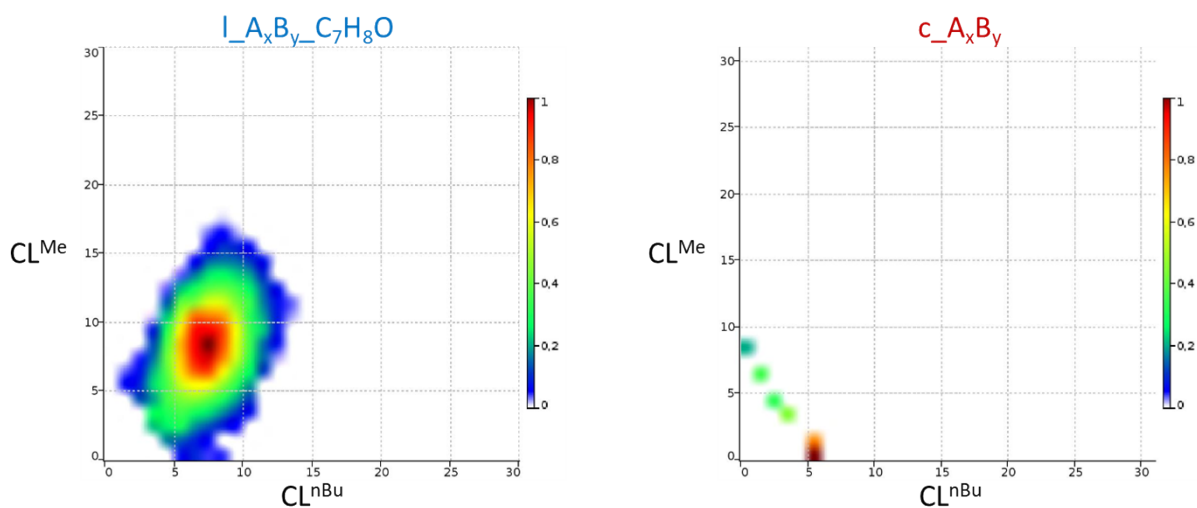

**Figure S24.** Contour-plots generated by the COCONUT software<sup>i</sup> from MALDI-ToF MS data of a  $P(\text{CL}^{\text{nBu}})_x\text{-co-}(\text{CL}^{\text{Me}})_y$  copolymer (Left: linear population; Right: cyclic population) (Table 1, entry 6).

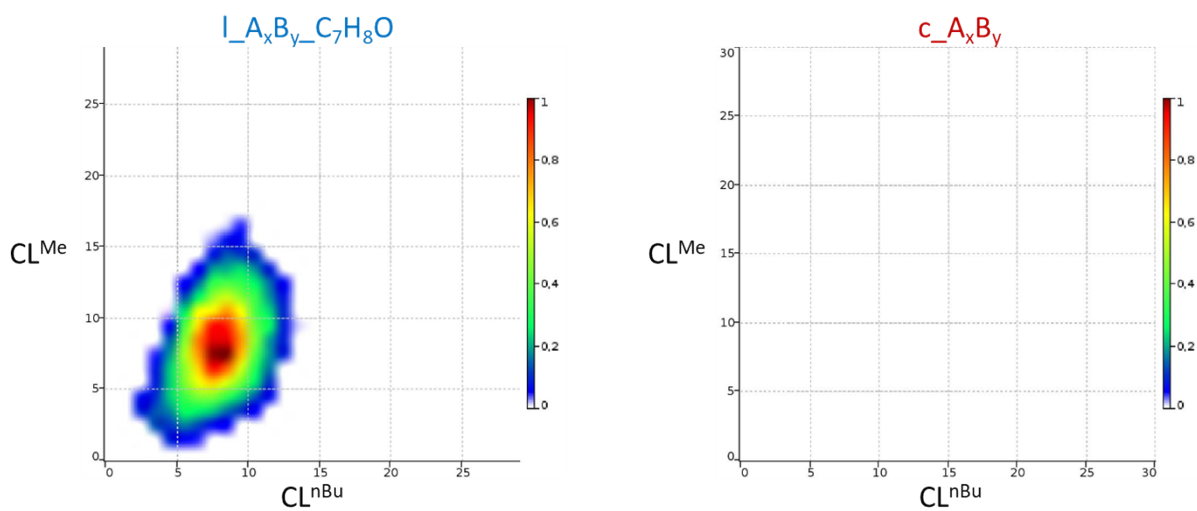

**Figure S25.** Contour-plots generated by the COCONUT software<sup>i</sup> from MALDI-ToF MS data of a  $P(\text{CL}^{\text{nBu}})_x\text{-co-}(\text{CL}^{\text{Me}})_y$  copolymer (Left: linear population; Right: cyclic population) (Table 1, entry 2).

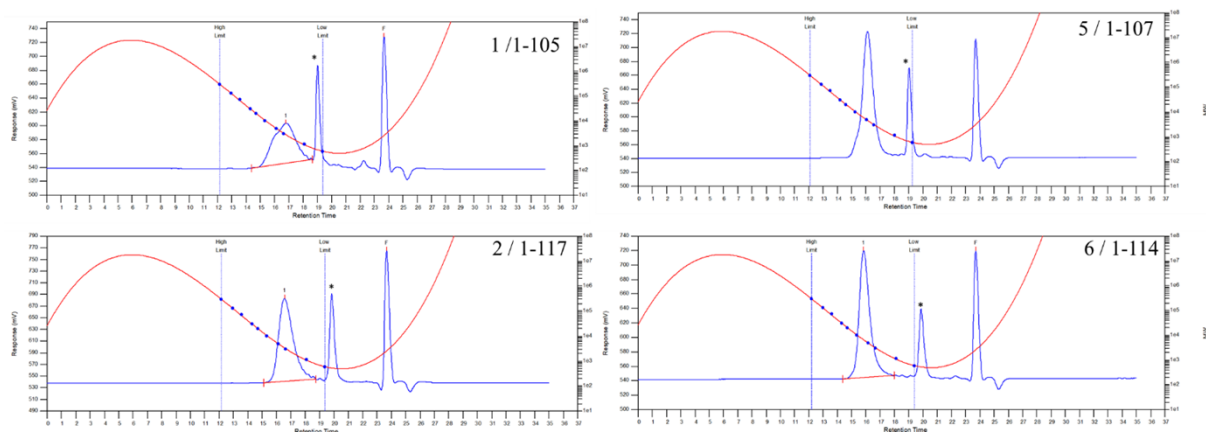

**Figure S26.** Representative SEC traces of homopolymers prepared from the ROP of *rac*-CL<sup>Me</sup> and *rac*-CL<sup>nBu</sup> with yttrium catalyst systems **1a-b**/BnOH (see Table S1, entries 1/(1-015); 2/(1-117); 5/(1-107); 6/(1-114)). \* stands for signal from residual ligand catalyst.

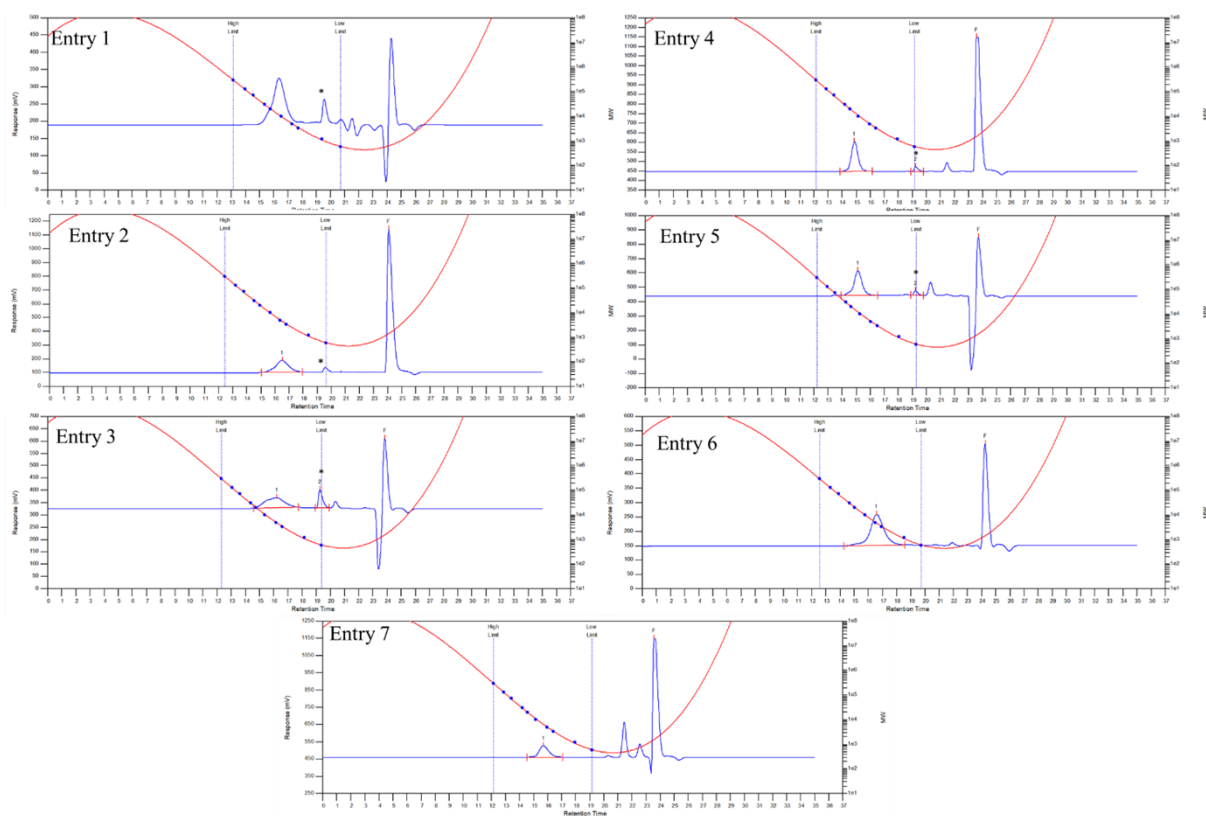

**Figure S27.** Representative SEC traces of copolymers prepared from the ROP of equimolar mixtures of (*S*)-CL<sup>Me</sup> and (*R*)-CL<sup>nBu</sup> with yttrium catalyst systems **1a-b**/BnOH (see Table 1, entries 1-7). \* stands for signal from residual ligand catalyst

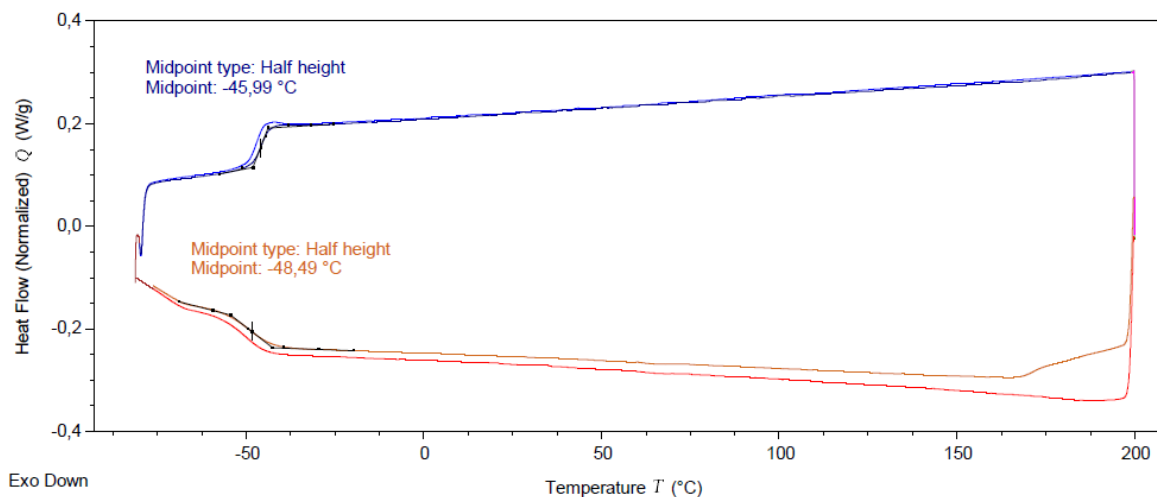

**Figure S28.** DSC thermogram (heating rate of  $10\text{ °C min}^{-1}$ , second heating cycle, from  $-80$  to  $+200\text{ °C}$ ) of a  $\text{PCL}^{\text{Me}}$  homopolymer prepared from the ROP of  $\text{rac-CL}^{\text{Me}}$  with the **1a**/BnOH catalyst system (Table S1, entry 1 / 1-105).

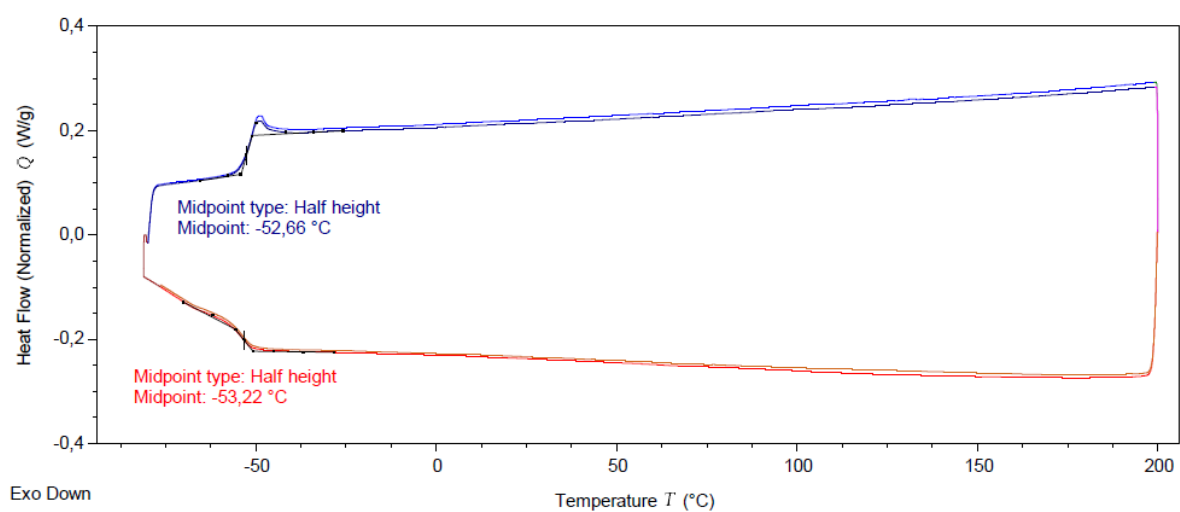

**Figure S29.** DSC thermogram (heating rate of  $10\text{ °C min}^{-1}$ , second heating cycle, from  $-80$  to  $+200\text{ °C}$ ) of a  $\text{PCL}^{\text{Me}}$  homopolymer prepared from the ROP of  $\text{rac-CL}^{\text{Me}}$  with the  $\text{Zn(BDI)/BnOH}$  catalyst system (Table S1, entry 2 / 1-117).

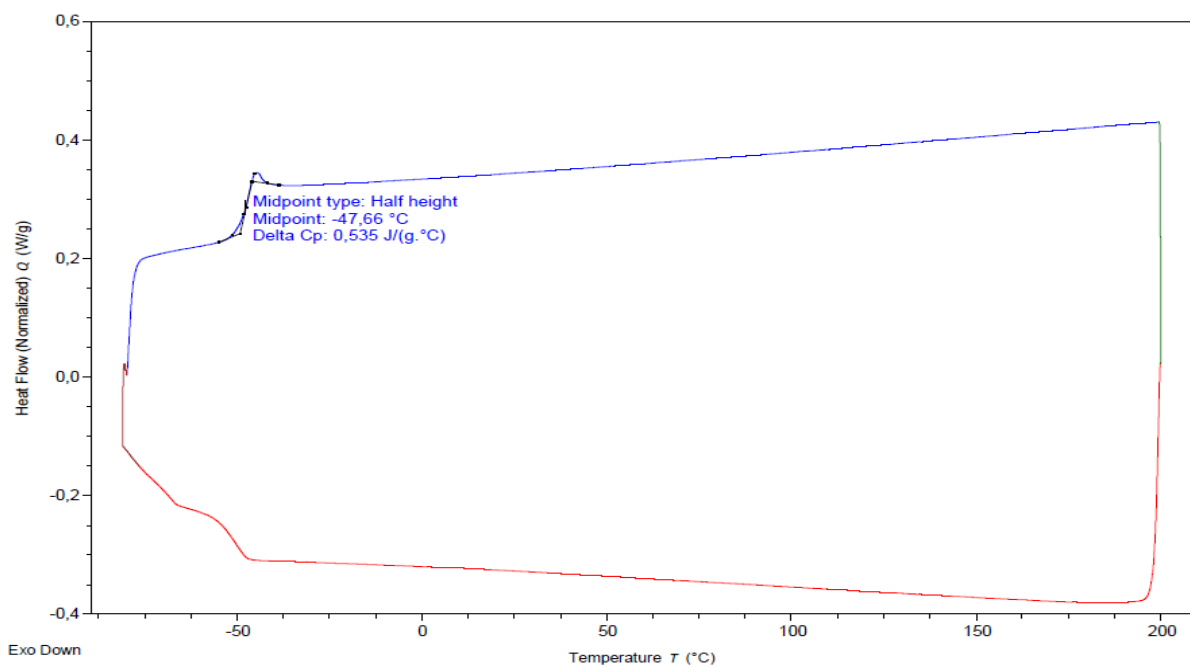

**Figure S30.** DSC thermogram (heating rate of  $10\text{ °C min}^{-1}$ , second heating cycle, from  $-80$  to  $+200\text{ °C}$ ) of a  $\text{PCL}^{\text{Me}}$  homopolymer prepared from the ROP of  $(S)\text{-CL}^{\text{Me}}$  with the  $\text{Zn}(\text{BDI})/\text{BnOH}$  catalyst system (Table S1, entry 4 / 1-193).

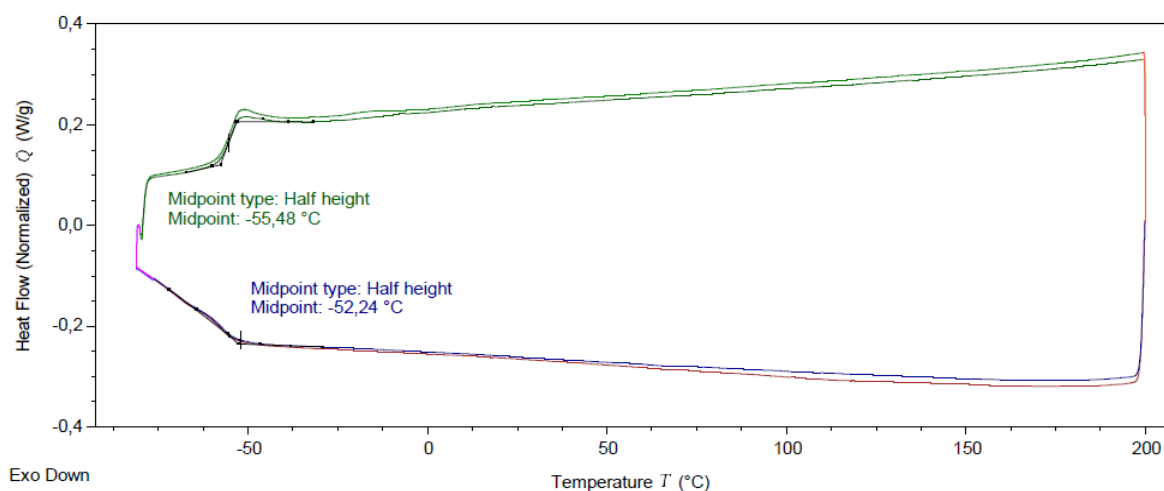

**Figure S31.** DSC thermogram (heating rate of  $10\text{ °C min}^{-1}$ , second heating cycle, from  $-80$  to  $+200\text{ °C}$ ) of a  $\text{PCL}^{\text{nBu}}$  homopolymer prepared from the ROP of  $\text{rac-CL}^{\text{nBu}}$  with the **1a**/ $\text{BnOH}$  catalyst system (Table S1, entry 5 / 1-107).

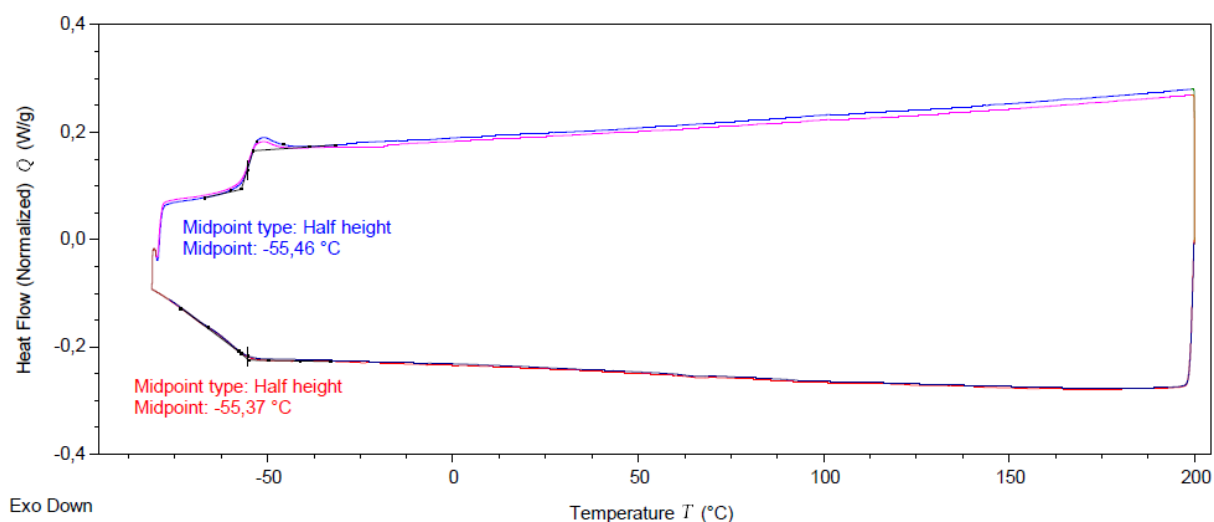

**Figure S32.** DSC thermogram (heating rate of  $10\text{ °C min}^{-1}$ , second heating cycle, from  $-80$  to  $+200\text{ °C}$ ) of a  $\text{PCL}^{n\text{Bu}}$  homopolymer prepared from the ROP of  $\text{rac-CL}^{n\text{Bu}}$  with the  $\text{Zn(BDI)/BnOH}$  catalyst system (Table S1, entry 6 / 1-114).

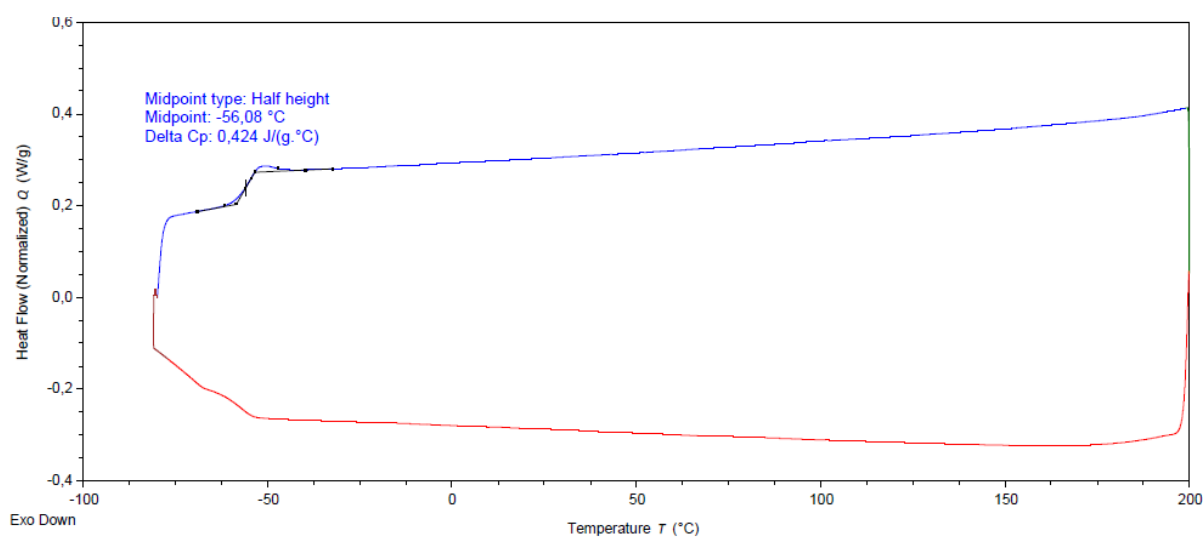

**Figure S33.** DSC thermogram (heating rate of  $10\text{ °C min}^{-1}$ , second heating cycle, from  $-80$  to  $+200\text{ °C}$ ) of a  $\text{PCL}^{n\text{Bu}}$  homopolymer prepared from the ROP of  $\text{rac-CL}^{n\text{Bu}}$  with the  $\text{Zn(BDI)/BnOH}$  catalyst system (Table S1, entry 8 / 1-164).

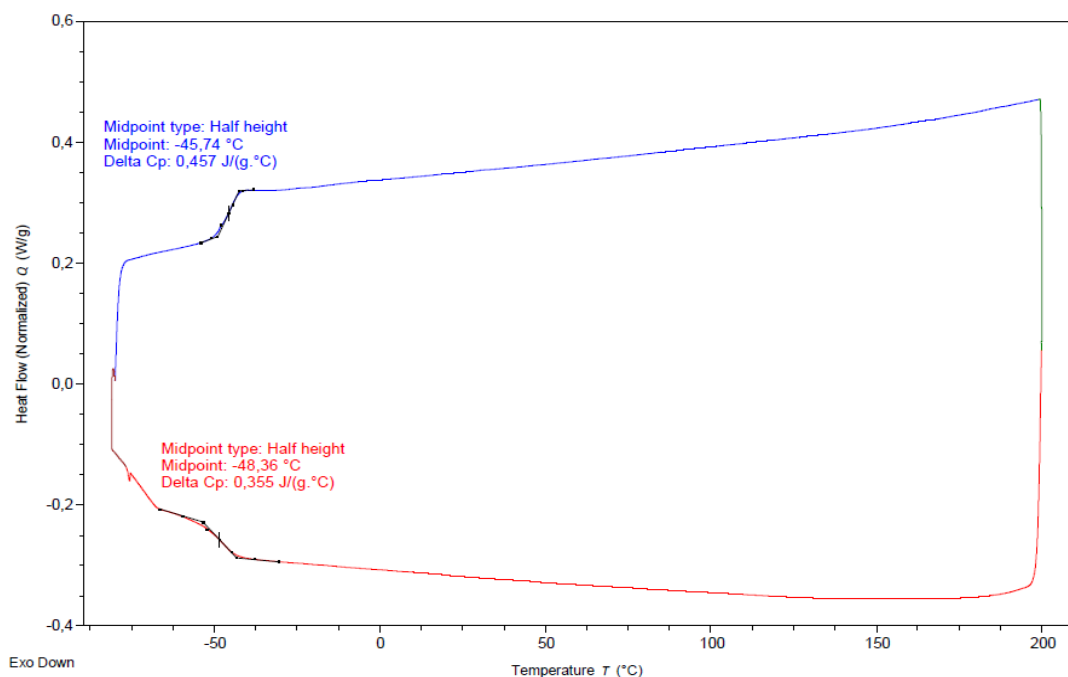

**Figure S34.** DSC thermogram (heating rate of  $10\text{ }^{\circ}\text{C min}^{-1}$ , second heating cycle, from  $-80$  to  $+200\text{ }^{\circ}\text{C}$ ) of a  $\text{P}(\text{CL}^{\text{Me}}\text{-co-CL}^{\text{nBu}})$  copolymer prepared from the ROCOP of a 1:1 mixture of  $(S)\text{-CL}^{\text{Me}}$  and  $(R)\text{-CL}^{\text{nBu}}$  mediated by the **1a**/ $\text{BnOH}$  (1:1) catalyst system (Table 1, entry 1).

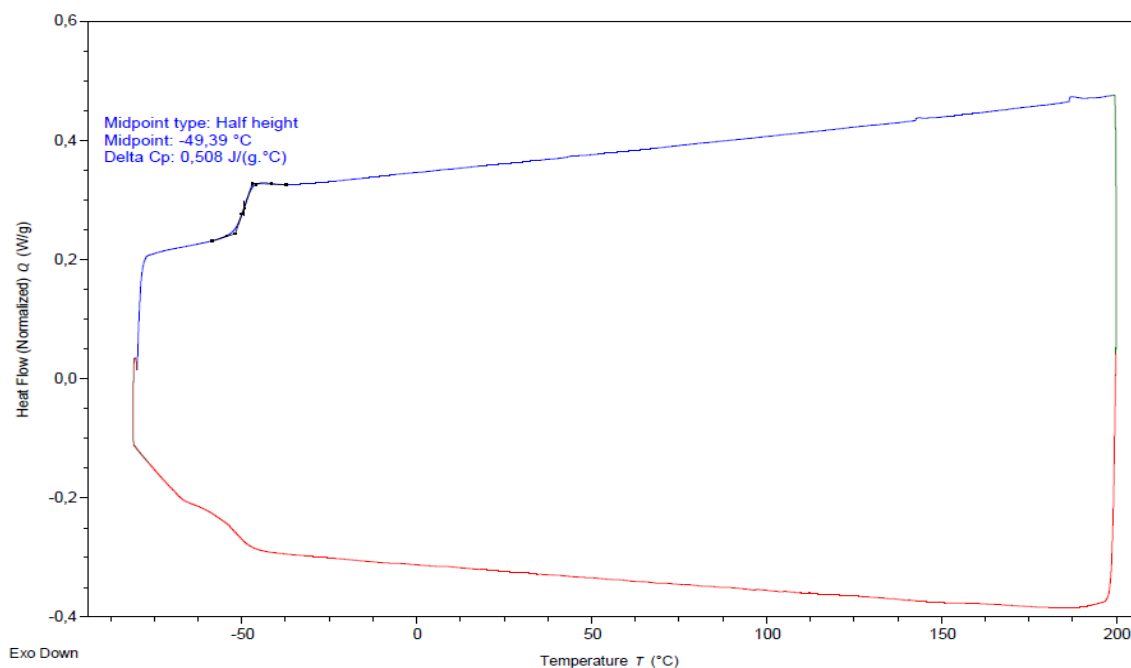

**Figure S35.** DSC thermogram (heating rate of  $10\text{ }^{\circ}\text{C min}^{-1}$ , second heating cycle, from  $-80$  to  $+200\text{ }^{\circ}\text{C}$ ) of a  $\text{P}(\text{CL}^{\text{Me}}\text{-co-CL}^{\text{nBu}})$  copolymer prepared from the ROCOP of a 1:1 mixture of  $(S)\text{-CL}^{\text{Me}}$  and  $(R)\text{-CL}^{\text{nBu}}$  mediated by the **1b**/ $\text{BnOH}$  (1:1) catalyst system (Table 1, entry 6).

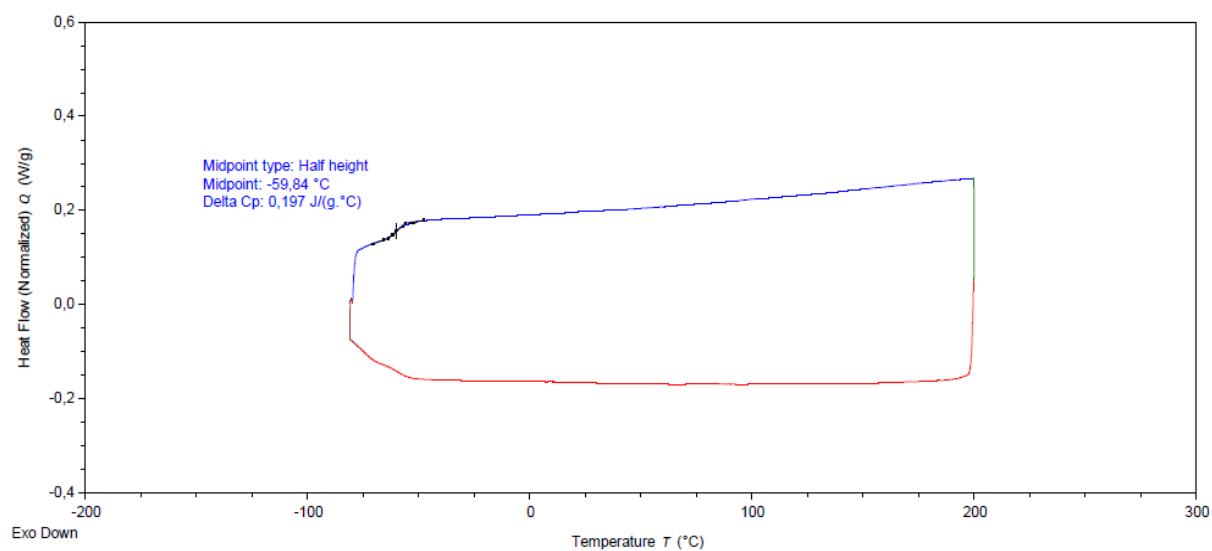

**Figure S36.** DSC thermogram (heating rate of  $10\text{ °C min}^{-1}$ , second heating cycle, from  $-80$  to  $+200\text{ °C}$ ) of a  $\text{P}(\text{CL}^{\text{Me}}\text{-}co\text{-}\text{CL}^{\text{nBu}})$  copolymer prepared from the ROCOP of a 1:1 mixture of  $(S)\text{-CL}^{\text{Me}}$  and  $(R)\text{-CL}^{\text{nBu}}$  mediated by the **1b**/BnOH (1:1) catalyst system (Table 1, entry 7).
